# Supplementary material for: Regulation of Zn and Fe transporters by the GPC1 gene during early wheat monocarpic senescence
Source: PubMed Central journal article supplement (PMC4302714; doi:10.1186/s12870-014-0368-2), 2014-12-19
Supplement: 12870_2014_368_MOESM1_ESM.pdf [file 12870_2014_368_MOESM1_ESM.pdf]

**Additional file 1**

**Regulation of Zn and Fe transporters by the *GPC1* gene during early wheat monocarpic senescence**

Stephen Pearce, Facundo Tabbita, Dario Cantu, Vince Buffalo, Raz Avni, Hans Vazquez-Gross, Rongrong Zhao, Christopher J. Conley, Assaf Distelfeld and Jorge Dubcovsky.

**This PDF file includes:**

Figures S1 to S10.

Tables S1 to S7.

**Figure S1.** Relative chlorophyll content of flag leaves taken from (a) TAU-2012, (b) NY-2012 and (c) NY-2013 experiments.

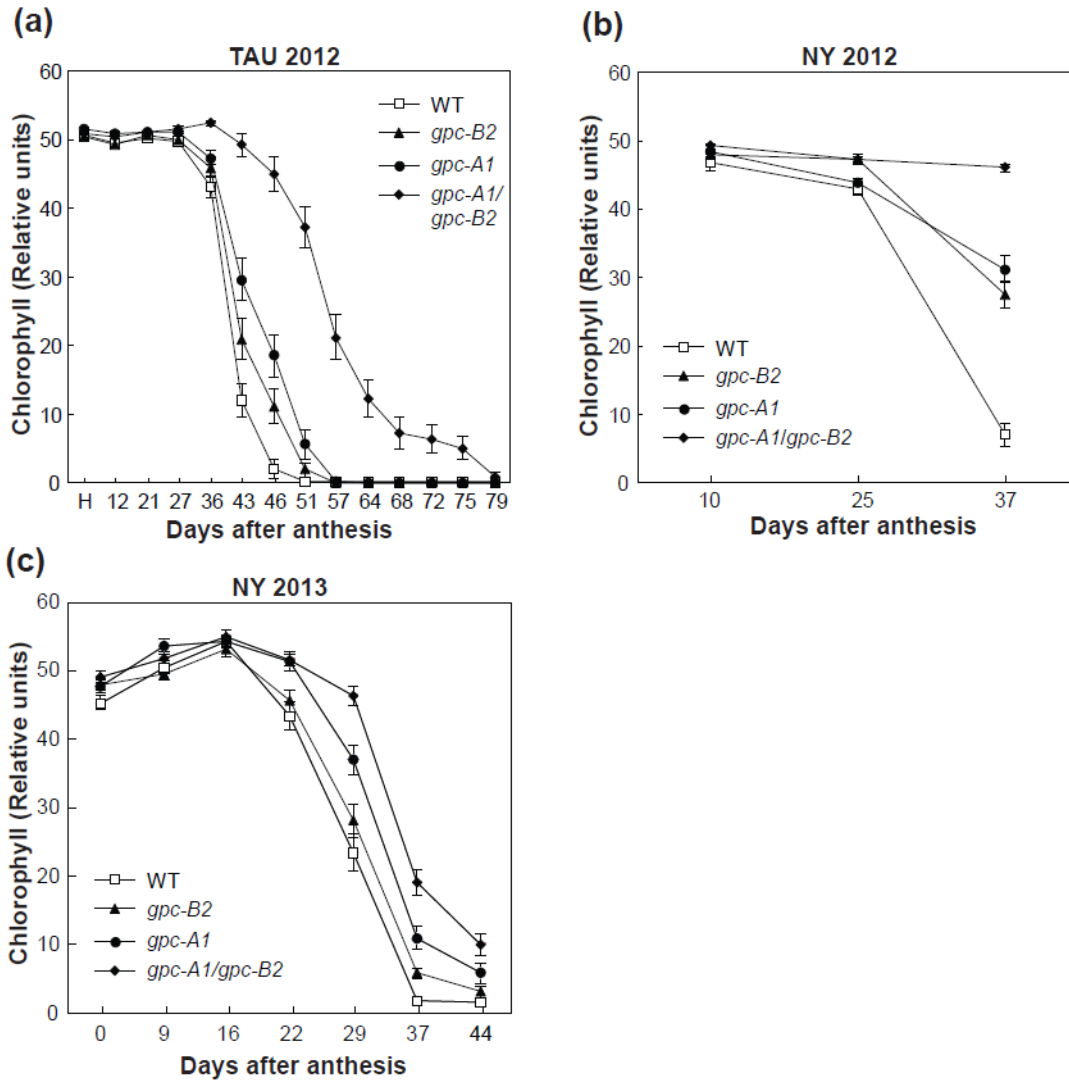

**Figure S2.** Spike and grain phenotypes in tetraploid *GPC* mutants. (a) Thousand kernel weight from three field experiments. Two-way factorial ANOVA was performed for TKW including location and genotype ( $P=0.02$ ) (b) Dry spike weight at three timepoints from the UCD 2012 experiment. \*\*\* =  $P<0.001$ , difference when compared to WT control sample from Dunnett's test. UCD = UC Davis 2012 experiment, TAU = Tel Aviv University 2012 experiment, NY = Newe Ya'ar research center 2013 experiment. DAA = Days after anthesis.

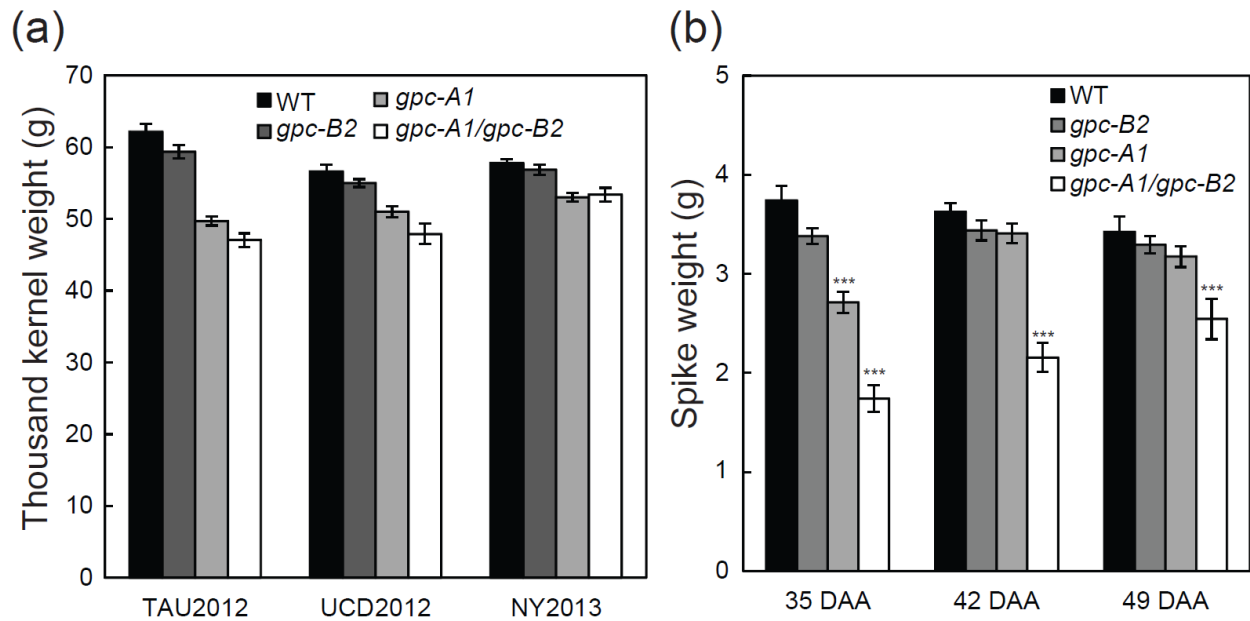

**Figure S3.** Phenotype of WT, *gpc-A1* and *gpc-A1/gpc-B2* TILLING mutants at 22 DAA (a-c) and at 60 DAA (d-f). In all panels, order of plants from left to right is WT, *gpc-A1*, *gpc-A1/gpc-B2*.

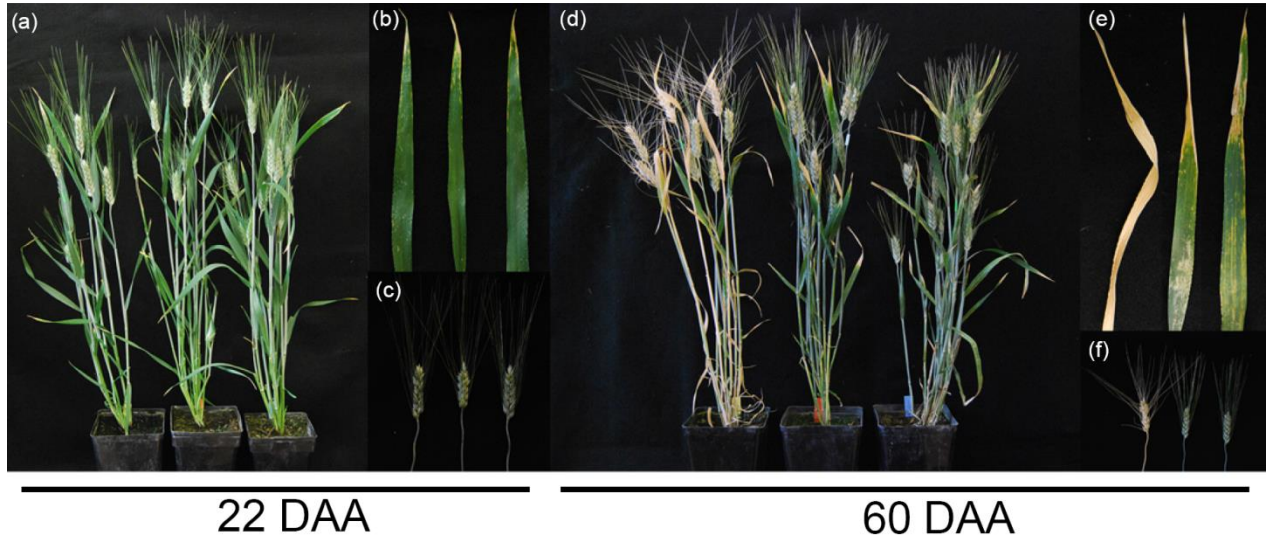

**Figure S4.** Principal component analyses of biological samples according to normalized expression values per locus of all genes by time point (a-c) and genotype (d-f).

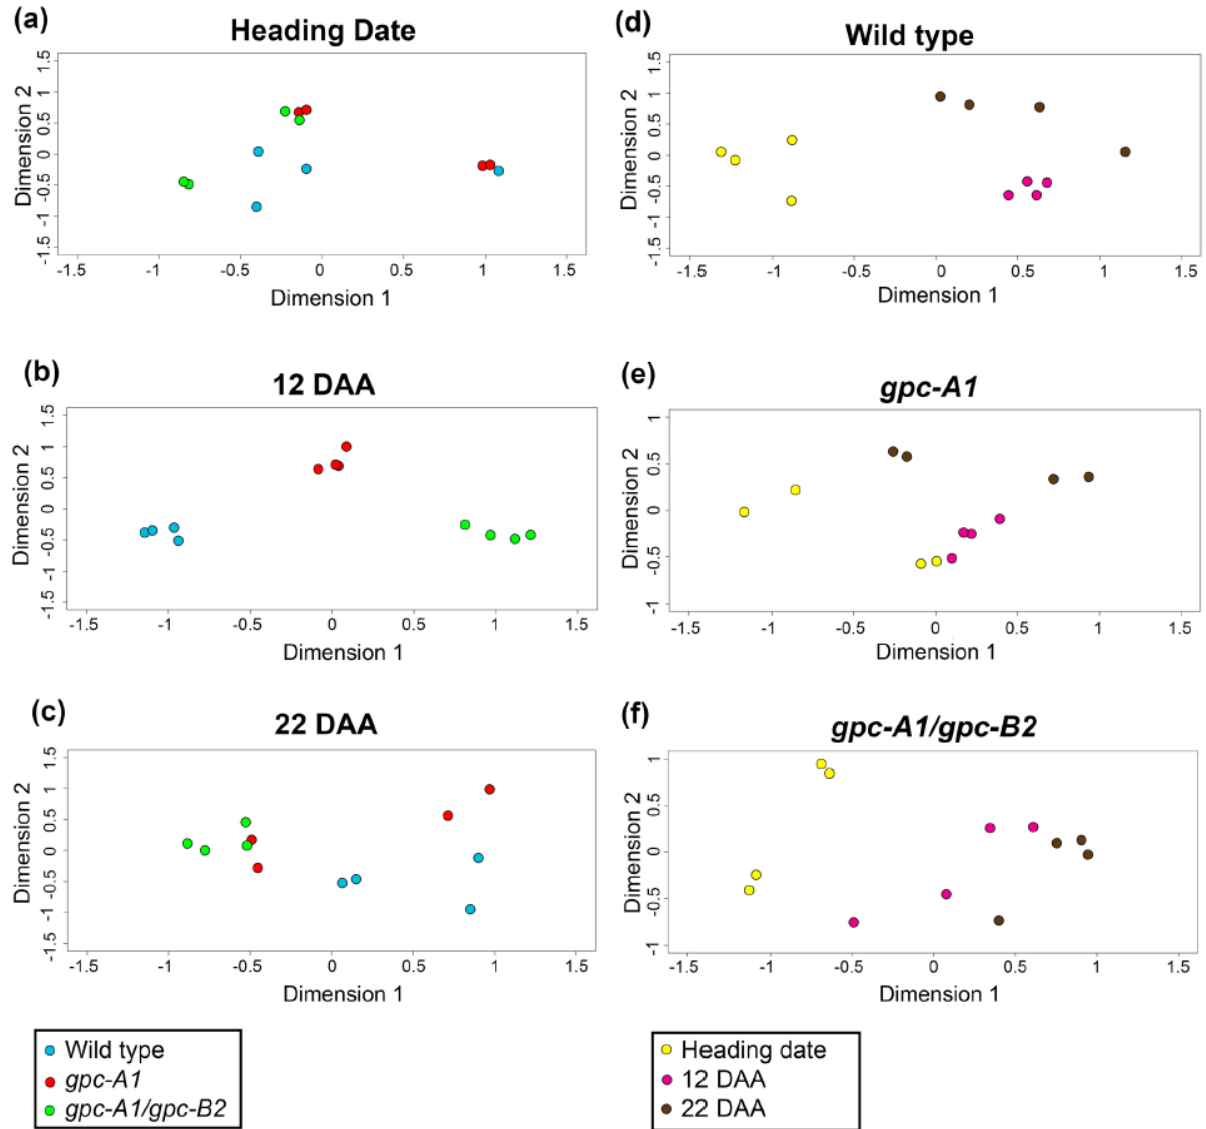

**Figure S5.** Relative expression of *GPC* genes in WT, *gpc-A1* and *gpc-A1/gpc-B2* lines. Expression presented as RPKM from four biological replicates  $\pm$ SE of normalized reads mapping to the loci representing each *GPC* gene.

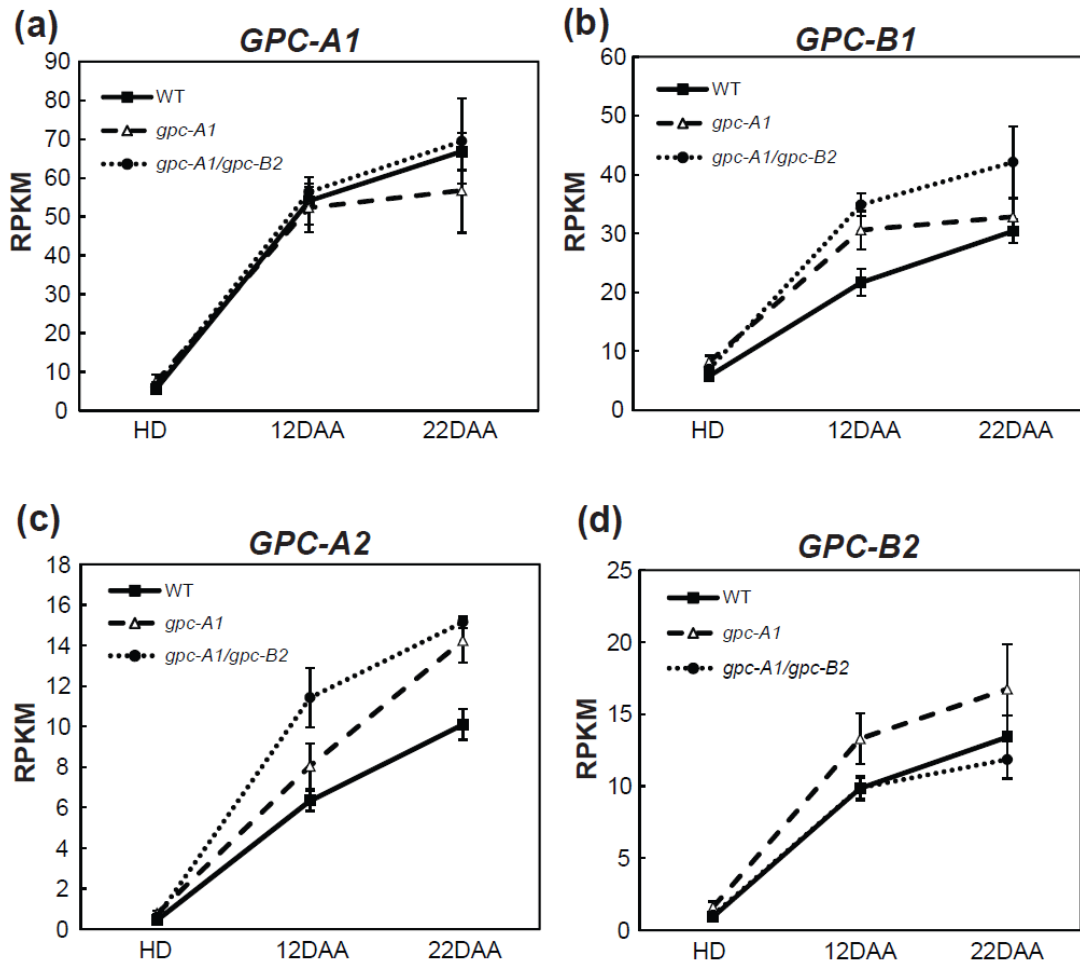

**Figure S6.** HMA phylogeny. Rice protein IDs (blue): OsHMA1 (NP\_001058417.1), OsHMA2 (BAM36049.1), OsHMA3 (BAJ25742.1). Wheat protein IDs (red): TaHMA1 (Traes\_7BL\_041308E74), TaHMA1-like (Traes\_5AL\_C89EEBE50), TaHMA2 (Traes\_7AL\_8304348B7), TaHMA2-like (Traes\_7AL\_6AE850114), TaHMA3 (Traes\_5BL\_D6C3DC326). Arrows indicate up or downregulation during senescence in WT plants. \* denotes differential expression in at least one *GPC* mutant genotype.

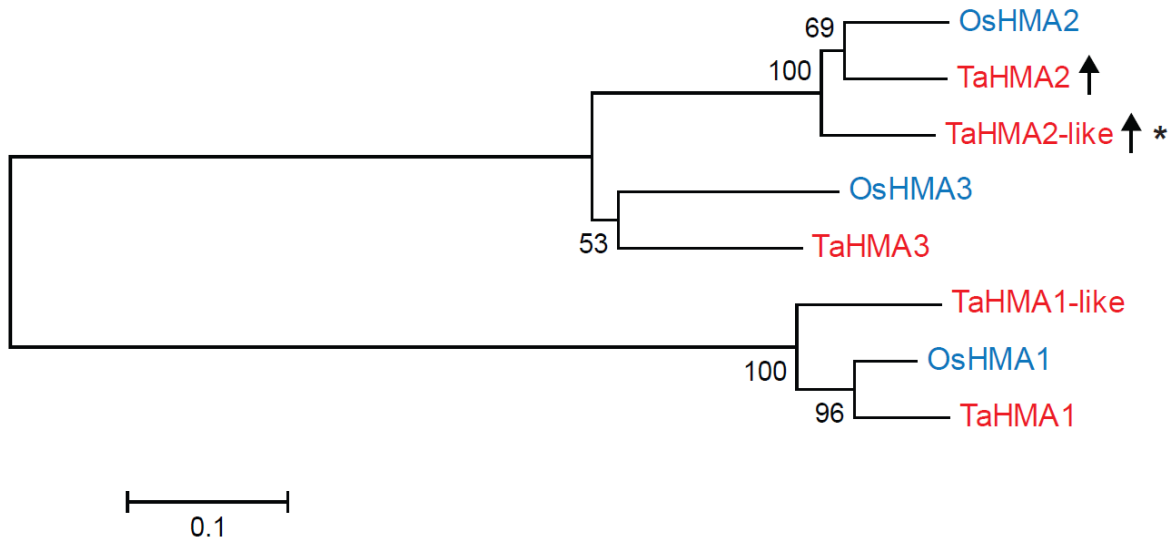

**Figure S7.** ZIFL phylogeny. Rice protein IDs (blue): OsZIFL1 (NP\_001042690.1), OsZIFL2 (NP\_001042748.1), OsZIFL3 (BAG89474), OsZIFL4 (NP\_001065681.1), OsZIFL5 (NP\_001065682.1), OsZIFL6 (ABA91327.1), OsZIFL7 (ABG22349.1), OsZIFL8 (ABA91341.1), OsZIFL9 (ABA95719), OsZIFL10 (NP\_001066084.1), OsZIFL11 (NP\_001066085.1), OsZIFL12 (ABG21873.1), OsZIFL13 (ABA95731.1). Wheat protein IDs (red): TaZIFL1 (Traes\_3AS\_C25151458), TaZIFL1-like (Traes\_3AS\_02DE247DA), TaZIFL2 (Traes\_5BL\_A0B9DE62E), TaZIFL3 (Traes\_4BS\_1DCF82CB7), TaZIFL7 (Traes\_5AL\_37BFFFD9E), TaZIFL8 (Traes\_4AL\_5C7A4DA54), TaZIFL9 (Traes\_5AL\_0599F7BC5). TaZIFL2-like1 was not included in the phylogeny. Arrows indicate up or downregulation during senescence in WT plants. \* denotes differential expression in at least one *GPC* mutant genotype.

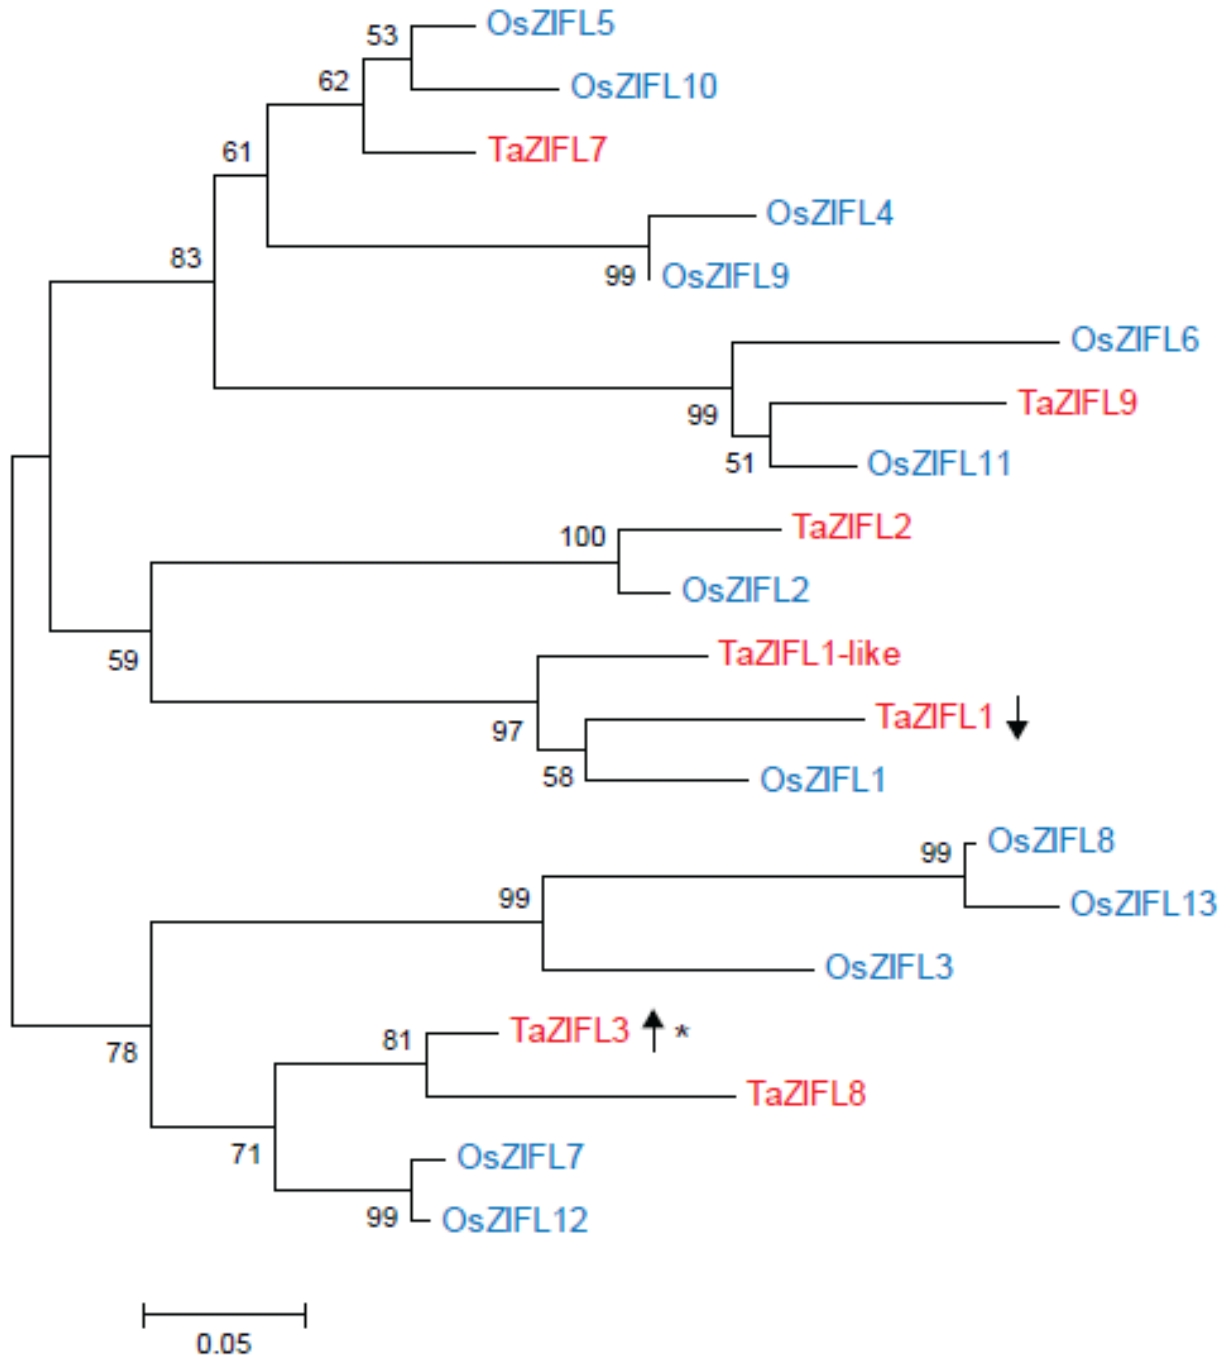



**Figure S8.** YSL phylogeny. Rice protein IDs (blue): OsYSL1 (NP\_001042539.1), OsYSL2 (BAD90812.1), OsYSL3 (BAE91883.1), OsYSL4 (BAE91884.1), OsYSL5 (BAE91885.1), OsYSL6 (BAE91886.1), OsYSL7 (BAE91887.1), OsYSL8 (BAE91888.1), OsYSL9 (BAE91889.1), OsYSL10 (BAE91890.1), OsYSL11 (BAE91891.1), OsYSL12 (BAE91892.1), OsYSL13 (BAE44204.1), OsYSL14 (BAE44205.1), OsYSL15 (BAE91893.1), OsYSL16 (BAE91894.1), OsYSL17 (BAE91895.1), OsYSL18 (BAE91896.1). Wheat protein IDs (red): TaYSL1 (Traes\_3B\_17BC3E1E2), TaYSL2 (Traes\_6BL\_3DD0BA741), TaYSL6 (Traes\_2BL\_0CBCC13AD), TaYSL9 (Traes\_2AL\_CFCA01C76), TaYSL10 (Traes\_6AL\_5642D5B44), TaYSL11 (Traes\_2BL\_68E0CA743), TaYSL12 (Traes\_2BL\_2BE05F104), TaYSL13 (Traes\_2AL\_F707FF2C3), TaYSL13-like (Traes\_2BL\_A14EA5AE4), TaYSL14 (Traes\_6AL\_7FB45D4DE), TaYSL15 (Traes\_6AL\_E36CFCE64), TaYSL15-like (Traes\_1BL\_CA93E6359), TaYSL16 (Traes\_2BL\_4A1181B731), TaYSL18 (Traes\_2BL\_6C5206B6D). Arrows indicate up or downregulation during senescence in WT plants. \* denotes differential expression in at least one *GPC* mutant genotype.

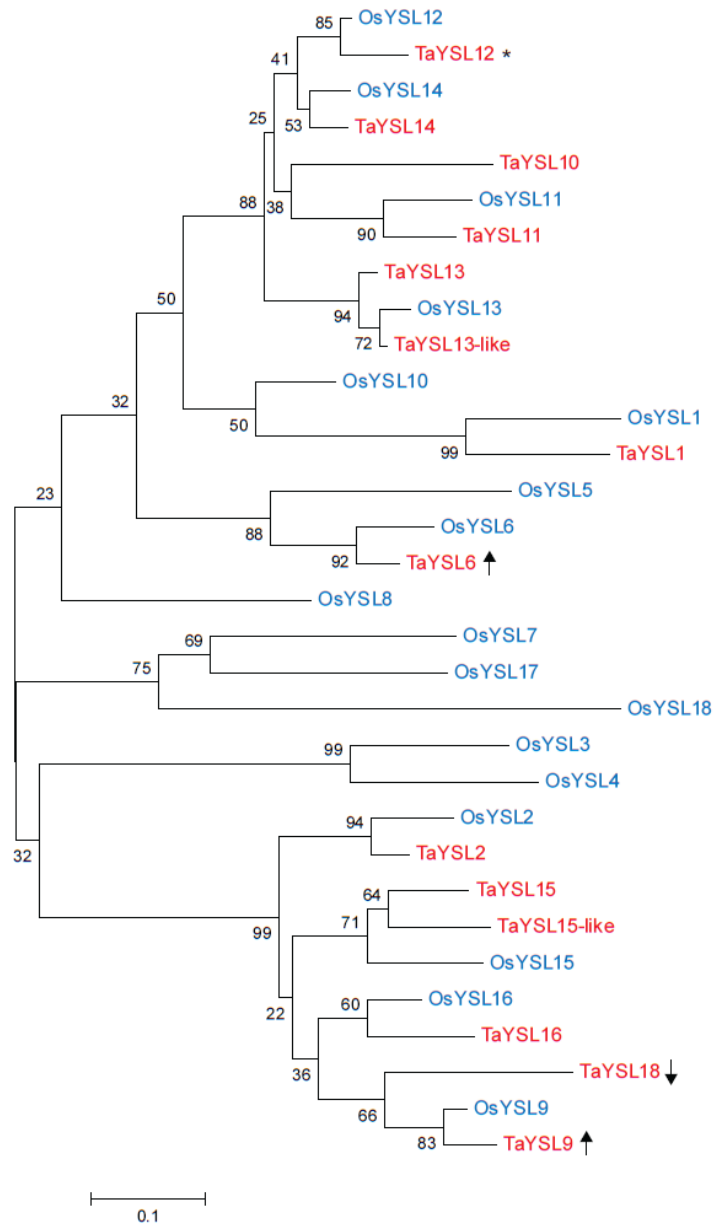

**Fig. S9.** ZIP phylogeny. Rice protein IDs (Blue): OsIRT1 (NP\_001050853.1), OsIRT2 (ABF98082.1), OsZIP1 (NP\_001045540.1), OsZIP2 (NP\_001050351.1), OsZIP3 (NP\_001053851.1), OsZIP4 (NP\_001061245.1), OsZIP5 (NP\_001055818.1), OsZIP6 (NP\_001054742.1), OsZIP7 (NP\_001054875.1), OsZIP8 (A3B111.1), OsZIP9 (Q0DHE3.3), OsZIP10 (EEC80824.1), OsZIP11 (NP\_001055173.1), OsZIP13 (NP\_001046190.1), OsZIP14 (NP\_001062003.1), OsZIP16 (XP\_006659010.1). Wheat protein IDs (red): TaIRT-like1 (Traes\_4AL\_9D79BE8FB), TaIRT-like2 (Traes\_4BS\_6527BBD54), TaZIP10 (Traes\_7AL\_A13A246B4), TaZIP10-like1 (Traes\_7AL\_F1D611563), TaZIP13-like1 (Traes\_7BL\_12C63350C), TaZIP13-like2 (Traes\_2BS\_9D8F265EC), TaZIP13-like3 (Traes\_2AL\_BE05B34FF), TaZIP1 (ABF55691.1), TaZIP2 (CAJ19368.1), TaZIP2-like (Traes\_6AS\_75C6428051), TaZIP3 (AAW68439.1), TaZIP5 (Traes\_4AS\_F5F7D2A8D), TaZIP6 (AK333945.1), TaZIP7 (ABF55692.1), TaZIP11 (Traes\_1AS\_7DC2CB902), TaZIP14 (AK331623.1), TaZIP15 (Traes\_6AS\_4E1D574BC), TaZIP16 (Traes\_7AL\_DFE86911E). Arrows indicate up or downregulation during senescence in WT plants. \* denotes differential expression in at least one *GPC* mutant genotype.

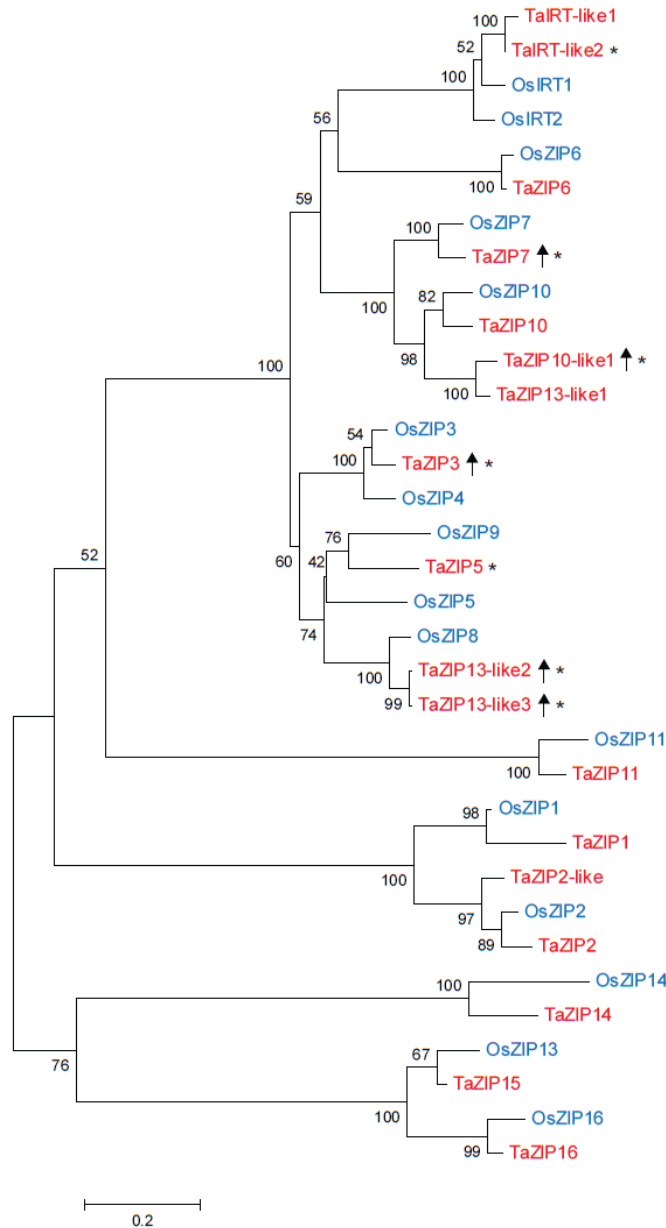

**Figure S10.** Validation of six transporter genes by qRT-PCR analysis. Side-by-side comparisons of the relative expression levels of each gene as assayed using RNA-seq (Normalized counts +/- SE) and qRT-PCR (fold-*ACTIN* +/- SE).

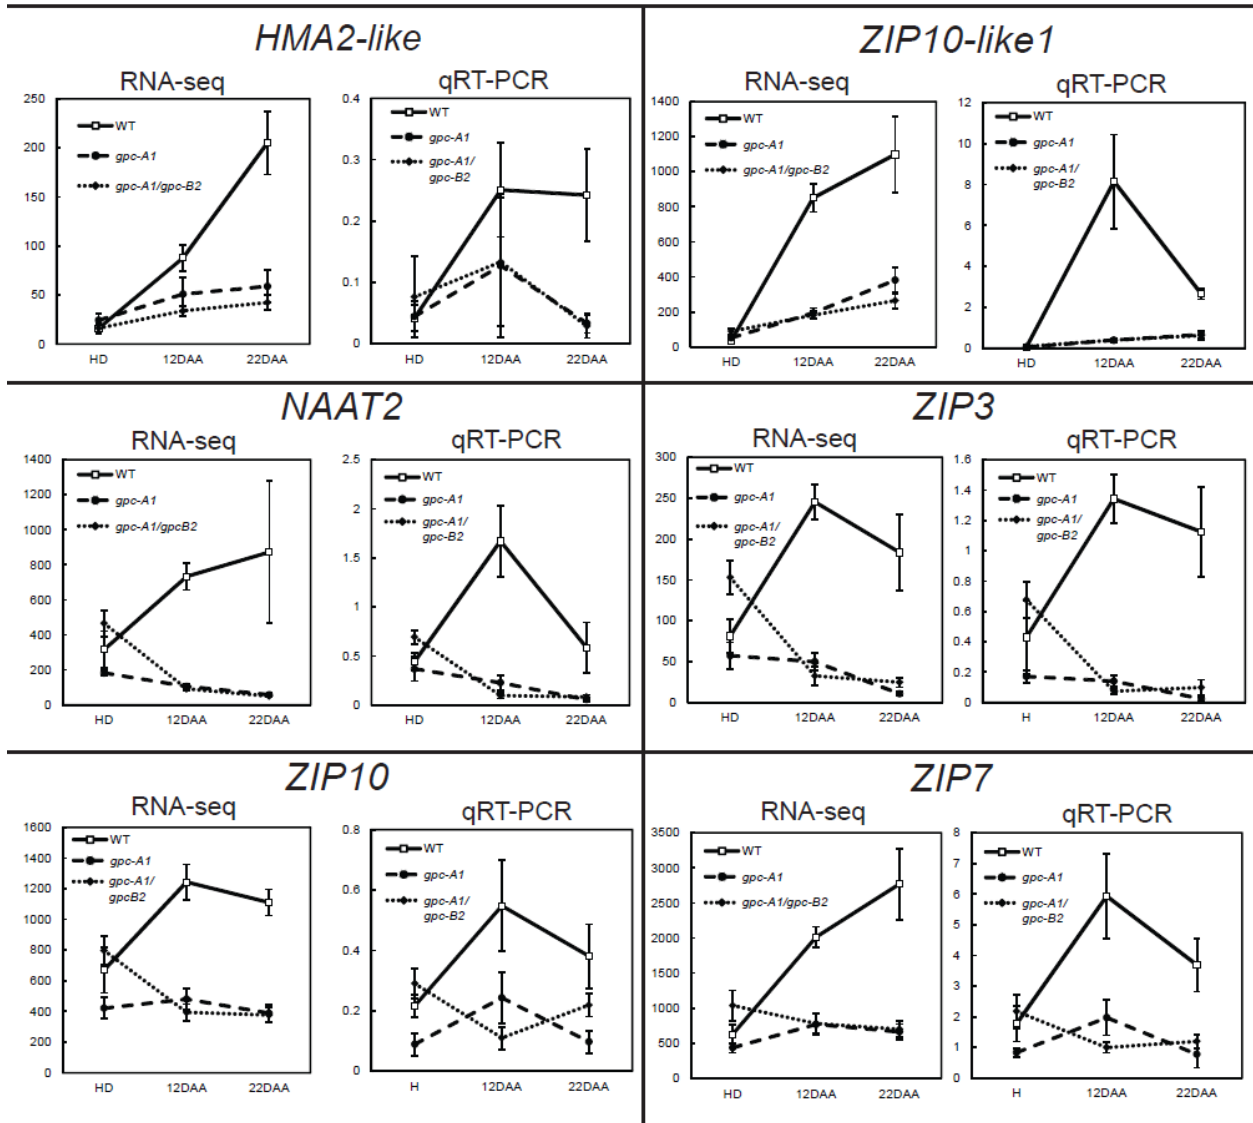

**Table S1.** Micronutrient concentrations in UCD-2012 and TAU-2012 experiments. GPC and micronutrient grain content for WT, single mutants and double mutant *GPC* knockout plants. Different letters denote significant differences between genotypes determined by Tukey-HSD test ( $P < 0.05$ ).

|                  |     | WT                          | <i>gpc-B2</i>               | <i>gpc-A1</i>               | <i>gpc-A1/gpc-B2</i>        |
|------------------|-----|-----------------------------|-----------------------------|-----------------------------|-----------------------------|
| <b>N (g/kg)</b>  | UCD | 29.78 ± 0.3 <sup>a</sup>    | 29.6 ± 0.3 <sup>a</sup>     | 23.16 ± 0.2 <sup>b</sup>    | 26.17 ± 0.7 <sup>c</sup>    |
|                  | TAU | 27.76 ± 0.4 <sup>a</sup>    | 29.49 ± 0.5 <sup>a</sup>    | 23.28 ± 0.6 <sup>b</sup>    | 24.4 ± 0.4 <sup>b</sup>     |
| <b>P (g/kg)</b>  | UCD | 3.7 ± 0.0 <sup>a</sup>      | 3.58 ± 0.1 <sup>a</sup>     | 3.62 ± 0.0 <sup>a</sup>     | 4.15 ± 0.1 <sup>b</sup>     |
|                  | TAU | 4.13 ± 0.1 <sup>a</sup>     | 4.22 ± 0.1 <sup>a</sup>     | 4.2 ± 0.0 <sup>a</sup>      | 4.3 ± 0.1 <sup>a</sup>      |
| <b>K (g/kg)</b>  | UCD | 4.88 ± 0.1 <sup>a</sup>     | 5.05 ± 0.1 <sup>a</sup>     | 5.78 ± 0.1 <sup>b</sup>     | 6.5 ± 0.9 <sup>c</sup>      |
|                  | TAU | 4.79 ± 0.1 <sup>a</sup>     | 4.53 ± 0.1 <sup>a</sup>     | 6.38 ± 0.1 <sup>b</sup>     | 6.15 ± 0.2 <sup>b</sup>     |
| <b>S (ppm)</b>   | UCD | 1848.00 ± 13.2 <sup>a</sup> | 1774.00 ± 21.6 <sup>b</sup> | 1564.00 ± 11.7 <sup>c</sup> | 1737.00 ± 24.1 <sup>b</sup> |
|                  | TAU | 1783.75 ± 22.5 <sup>b</sup> | 1866.25 ± 17.5 <sup>a</sup> | 1690.00 ± 26.8 <sup>c</sup> | 1777.5 ± 11.1 <sup>b</sup>  |
| <b>B (ppm)</b>   | UCD | 2.42 ± 0.2 <sup>a</sup>     | 2.75 ± 0.1 <sup>b</sup>     | 2.94 ± 0.2 <sup>b</sup>     | 3.36 ± 0.1 <sup>c</sup>     |
|                  | TAU | 0.93 ± 0.0 <sup>a</sup>     | 1.3 ± 0.2 <sup>ab</sup>     | 1.4 ± 0.2 <sup>b</sup>      | 1.35 ± 0.1 <sup>ab</sup>    |
| <b>Ca (g/kg)</b> | UCD | 0.26 ± 0.1 <sup>ab</sup>    | 0.25 ± 0.0 <sup>a</sup>     | 0.28 ± 0.1 <sup>b</sup>     | 0.36 ± 0.1 <sup>c</sup>     |
|                  | TAU | 0.41 ± 0.0 <sup>a</sup>     | 0.42 ± 0.1 <sup>a</sup>     | 0.45 ± 0.0 <sup>a</sup>     | 0.57 ± 0.1 <sup>b</sup>     |
| <b>Mg (g/kg)</b> | UCD | 1.41 ± 0.1 <sup>a</sup>     | 1.44 ± 0.0 <sup>ab</sup>    | 1.51 ± 0.1 <sup>b</sup>     | 1.67 ± 0.0 <sup>c</sup>     |
|                  | TAU | 1.33 ± 0.1 <sup>a</sup>     | 1.41 ± 0.0 <sup>b</sup>     | 1.35 ± 0.0 <sup>ab</sup>    | 1.39 ± 0.0 <sup>ab</sup>    |
| <b>Zn (ppm)</b>  | UCD | 50.3 ± 1.1 <sup>a</sup>     | 48.09 ± 2.1 <sup>a</sup>    | 39.42 ± 0.6 <sup>b</sup>    | 42.63 ± 1.2 <sup>b</sup>    |
|                  | TAU | 53.56 ± 4.7 <sup>b</sup>    | 61.54 ± 5.2 <sup>a</sup>    | 45.28 ± 2.8 <sup>c</sup>    | 40.93 ± 2.9 <sup>c</sup>    |
| <b>Mn (ppm)</b>  | UCD | 34.68 ± 1.8 <sup>bc</sup>   | 32.71 ± 1.1 <sup>ab</sup>   | 28.52 ± 0.7 <sup>a</sup>    | 37.85 ± 2.0 <sup>c</sup>    |
|                  | TAU | 37.66 ± 1.3 <sup>a</sup>    | 52.66 ± 3.5 <sup>b</sup>    | 32.93 ± 2.3 <sup>a</sup>    | 40.48 ± 2.5 <sup>a</sup>    |
| <b>Fe (ppm)</b>  | UCD | 37.66 ± 0.9 <sup>a</sup>    | 38.32 ± 1.3 <sup>a</sup>    | 28.88 ± 0.4 <sup>b</sup>    | 29.83 ± 1.7 <sup>b</sup>    |
|                  | TAU | 31.24 ± 1.6 <sup>b</sup>    | 34.24 ± 1.3 <sup>a</sup>    | 25.48 ± 1.4 <sup>c</sup>    | 24.73 ± 1.6 <sup>c</sup>    |
| <b>Cu (ppm)</b>  | UCD | 5.82 ± 0.1 <sup>a</sup>     | 8.62 ± 2.5 <sup>a</sup>     | 5.72 ± 0.2 <sup>a</sup>     | 5.49 ± 0.3 <sup>a</sup>     |
|                  | TAU | 6.99 ± 0.1 <sup>a</sup>     | 6.7 ± 0.2 <sup>a</sup>      | 6.18 ± 0.1 <sup>b</sup>     | 4.83 ± 0.2 <sup>c</sup>     |

**Table S2.** Summary of raw and trimmed Illumina sequencing reads and mapping rates from each biological replicate.

| Time point     | Genotype             | Replicate | Raw reads  | Trimmed reads | % mapped to defined loci | % uniquely mapped to defined loci |
|----------------|----------------------|-----------|------------|---------------|--------------------------|-----------------------------------|
| <b>Heading</b> | <b>WT</b>            | 1         | 38,665,098 | 34,773,202    | 93.99                    | 58.74                             |
|                |                      | 2         | 39,475,711 | 39,297,400    | 94.15                    | 59.59                             |
|                |                      | 3         | 31,381,725 | 29,301,745    | 94.24                    | 58.99                             |
|                |                      | 4         | 33,848,760 | 33,264,328    | 93.36                    | 58.36                             |
|                | <i>gpc-A1</i>        | 1         | 32,102,685 | 28,868,068    | 94.35                    | 58.83                             |
|                |                      | 2         | 37,154,487 | 36,992,899    | 94.49                    | 59.75                             |
|                |                      | 3         | 31,889,453 | 29,763,897    | 94.52                    | 58.80                             |
|                |                      | 4         | 30,140,634 | 29,622,936    | 93.65                    | 58.34                             |
|                | <i>gpc-A1/gpc-B2</i> | 1         | 41,424,154 | 37,211,906    | 94.65                    | 52.42                             |
|                |                      | 2         | 39,970,397 | 39,787,853    | 93.83                    | 59.02                             |
|                |                      | 3         | 33,530,071 | 31,320,928    | 93.64                    | 58.27                             |
|                |                      | 4         | 32,944,098 | 32,368,503    | 93.34                    | 58.03                             |
| <b>12 DAA</b>  | <b>WT</b>            | 1         | 39,834,397 | 35,863,953    | 93.23                    | 58.44                             |
|                |                      | 2         | 40,040,076 | 39,856,173    | 93.72                    | 59.60                             |
|                |                      | 3         | 34,534,155 | 32,265,656    | 93.00                    | 57.59                             |
|                |                      | 4         | 85,099,084 | 83,638,792    | 92.69                    | 58.57                             |
|                | <i>gpc-A1</i>        | 1         | 35,410,326 | 31,884,963    | 94.65                    | 49.51                             |
|                |                      | 2         | 39,337,625 | 39,151,166    | 93.36                    | 59.22                             |
|                |                      | 3         | 33,414,297 | 31,248,455    | 93.48                    | 59.11                             |
|                |                      | 4         | 32,263,546 | 31,713,135    | 92.51                    | 58.12                             |
|                | <i>gpc-A1/gpc-B2</i> | 1         | 31,076,406 | 27,987,586    | 93.97                    | 58.98                             |
|                |                      | 2         | 35,012,331 | 34,832,872    | 91.94                    | 58.38                             |
|                |                      | 3         | 25,188,810 | 23,538,518    | 93.25                    | 58.44                             |
|                |                      | 4         | 28,255,874 | 27,763,518    | 93.85                    | 59.00                             |
| <b>22 DAA</b>  | <b>WT</b>            | 1         | 40,666,581 | 36,539,348    | 92.83                    | 58.82                             |
|                |                      | 2         | 37,814,738 | 37,635,671    | 92.18                    | 59.44                             |
|                |                      | 3         | 33,437,511 | 31,252,956    | 92.87                    | 59.07                             |
|                |                      | 4         | 31,528,730 | 30,988,194    | 93.16                    | 59.17                             |
|                | <i>gpc-A1</i>        | 1         | 37,399,266 | 33,359,639    | 92.56                    | 59.56                             |
|                |                      | 2         | 38,746,000 | 38,565,077    | 91.79                    | 59.77                             |
|                |                      | 3         | 28,514,156 | 26,523,981    | 93.75                    | 59.41                             |
|                |                      | 4         | 30,074,410 | 29,535,381    | 93.73                    | 59.68                             |
|                | <i>gpc-A1/gpc-B2</i> | 1         | 45,208,215 | 40,694,293    | 93.20                    | 58.49                             |
|                |                      | 2         | 39,929,531 | 39,736,903    | 91.96                    | 59.29                             |
|                |                      | 3         | 36,835,190 | 34,436,035    | 93.17                    | 59.44                             |
|                |                      | 4         | 33,732,441 | 33,162,000    | 93.48                    | 58.34                             |
| <b>Average</b> |                      |           | 36,552,249 | 34,854,109    | 93.40                    | 58.46                             |

**Table S3.** 26 genes commonly differentially regulated during senescence between the current study and Gregersen & Holm (2007).

| Probe name (Gregersen et al. 2011) | Corresponding URGI contig                  | BLAST e-value | Hit description                                                                                                    |
|------------------------------------|--------------------------------------------|---------------|--------------------------------------------------------------------------------------------------------------------|
| G05_p234_plate_12                  | 6BL-ab-k71_contig_4275858:15270-21181      | 0             | gi 1657845 gb AAB18202.1  cold acclimation protein WCOR410c [Triticum aestivum]                                    |
| H01_p436_plate_12                  | 4BL-ab-k71_contig_6973512:3778-8889        | 5E-84         | gi 146231063 gb ABQ12768.1  hypersensitive response protein [Triticum aestivum]                                    |
| C04_p638_plate_2                   | 2AS-ab-k71_contig_5252955:1-993            | 0             | gi 474253786 gb EMS60319.1  Ribonuclease 1 [Triticum urartu]                                                       |
| B10_p234_plate_26                  | 3AL-ab-k71_contig_4355214:1431-1859        | 2E-64         | -                                                                                                                  |
| D06_p335_plate_3                   | 1BL-ab-k71_contig_3863282:2209-5503        | 5E-65         | gi 475538858 gb EMT09311.1  Aldehyde dehydrogenase family 2 member C4 [Aegilops tauschii]                          |
| A04_a22_plate_12                   | 2AL-ab-k71_contig_6315374:6012-9120        | 1E-120        | gi 475572136 gb EMT16425.1  Cysteine proteinase 1 [Aegilops tauschii]                                              |
| D02_j223_plate_15                  | 2AL-ab-k71_contig_6399751:5443-12037       | 1E-169        | gi 475609973 gb EMT27565.1  ABC transporter C family member 9 [Aegilops tauschii]                                  |
| A02_e411_plate_2                   | 6BL-ab-k71_contig_1176509:1-8128           | 5E-86         | gi 299482520 gb ADJ19186.1  lysine ketoglutarate reductase/saccharopine dehydrogenase [Triticum turgidum]          |
| D10_e411_plate_13                  | 1AL_v2-ab-k71_contig_3885764:9943-15907    | 1E-146        | gi 460373787 ref XP_004232695.1  PREDICTED: aspartic proteinase-like [Solanum lycopersicum]                        |
| F03_N130_plate_64                  | 6AL-ab-k71_contig_5767722:1-2056           | 1E-120        | gi 475621610 gb EMT31542.1  3-ketoacyl-CoA thiolase 2, peroxisomal [Aegilops tauschii]                             |
| G03_p234_plate_13                  | 3B-ab-k71_contig_10644572:1675-3600        | 0             | gi 474436565 gb EMS68215.1  UDP-glycosyltransferase 87A1 [Triticum urartu]                                         |
| C08_d26_plate_11                   | 6BL-ab-k71_contig_4396688:584-4562         | 1E-68         | gi 475574510 gb EMT17003.1  Acetylornithine deacetylase [Aegilops tauschii]                                        |
| B03_p234_plate_11_run_2            | 2AS-ab-k71_contig_5303733:4078-6463        | 0             | gi 326493682 dbj BAJ85302.1  predicted protein [Hordeum vulgare subsp. vulgare]                                    |
| A11_a11_plate_3                    | 4BS-ab-k71_contig_4861976:6480-7581        | 2E-36         | gi 474290679 gb EMS61268.1  Metallothionein-like protein 1 [Triticum urartu]                                       |
| E01_N130_plate_48                  | 5BL-ab-k71_contig_10818068:1381-4394       | 0             | gi 357122996 ref XP_003563199.1  PREDICTED: phospholipase C 4-like [Brachypodium distachyon]                       |
| B01_p436_plate_8_run_2             | 2AS-ab-k71_contig_5256148:581-5506         | 4E-51         | gi 357116071 ref XP_003559808.1  PREDICTED: acyl-CoA dehydrogenase family member 10-like [Brachypodium distachyon] |
| C02_p335_plate_7                   | 7BS-ab-k71_contig_584435:1-200             | 1E-99         | gi 475625512 gb EMT32999.1  NAC domain-containing protein 18 [Aegilops tauschii]                                   |
| B03_h116_plate_2                   | 4BL-ab-k71_contig_7000160:3976-8945        | 3E-69         | gi 475530866 gb EMT07974.1  Prolyl 3-hydroxylase 1 [Aegilops tauschii]                                             |
| D08_n129_plate_9                   | 1AS-ab-k71_contig_310232:674-1526          | 4E-99         | -                                                                                                                  |
| H07_p436_plate_10                  | 4AL_v2-ab-k71_contig_4AL_7112091:4128-8300 | 1E-170        | gi 475509418 gb EMT05187.1  Glutamate decarboxylase 1 [Aegilops tauschii]                                          |
| E06_p335_plate_6                   | 5BS-ab-k71_contig_2277410:2149-11495       | 1E-126        | gi 283970976 gb ADB54814.1  universal stress protein 9303 [Hordeum vulgare subsp. vulgare]                         |
| H08_p234_plate_14                  | 1BL-ab-k71_contig_3868206:2733-3775        | 0             | gi 283970978 gb ADB54815.1  universal stress protein 9303 [Hordeum vulgare subsp. vulgare]                         |
| C05_l226_plate_3                   | 2AL-ab-k71_contig_6340847:3105-5951        | 4E-31         | gi 473939569 gb EMS50260.1  Ferredoxin-6, chloroplastic [Triticum urartu]                                          |
| E09_p335_plate_3                   | 1AS-ab-k71_contig_2470305:166-1376         | 3E-72         | gi 4325045 gb AAD17232.1  S-adenosylmethionine decarboxylase precursor [Triticum aestivum]                         |
| D09_p335_plate_7                   | 3AL-ab-k71_contig_4427563:4889-5726        | 0             | gi 473881465 gb EMS47979.1  putative glutathione S-transferase GSTF1 [Triticum urartu]                             |
| D10_p537_plate_6                   | 3B-ab-k71_contig_10631124:2445-5741        | 2E-45         | gi 514830677 gb AGO59325.1  MYB13 transcription factor [Triticum aestivum]                                         |
|                                    |                                            |               | gi 475497046 gb EMT03967.1  GDSL esterase/lipase [Aegilops tauschii]                                               |

**Table S4.** 196 affymetrix contigs from Jukanti et al. 2008 also differentially expressed during senescence.

| Affymetrix ID (Jukanti et al. 2008) | Corresponding URGI contig                  | BLAST e-value | Hit description                                                                           |
|-------------------------------------|--------------------------------------------|---------------|-------------------------------------------------------------------------------------------|
| Contig903_at                        | 5BL-ab-k71_contig_10815975:7698-9613       | 1.00E-154     | gi 474396172 gb EMS65694.1  Alcohol dehydrogenase 2 [Triticum urartu]                     |
| HF12K17r_at                         | 2AS-ab-k71_contig_5273012:812-7972         | 8.00E-80      | gi 326492077 dbj BAJ98263.1  predicted protein [Hordeum vulgare subsp. vulgare]           |
| Contig24024_at                      | 6AL-ab-k71_contig_5814401:2506-3427        | 2.00E-15      | gi 326502074 dbj BAK06529.1  predicted protein [Hordeum vulgare subsp. vulgare]           |
| Contig14921_s_at                    | 3B-ab-k71_contig_10604827:215-5360         | 4.00E-78      | gi 474066737 gb EMS54176.1  Purple acid phosphatase 2 [Triticum urartu]                   |
| Contig16604_at                      | 4BS-ab-k71_contig_4901464:24-823           | 1E-147        | #N/A                                                                                      |
| Contig15056_at                      | 2BL-ab-k71_contig_7971302:3009-7466        | 9E-77         | gi 326512690 dbj BAK03252.1  predicted protein [Hordeum vulgare subsp. vulgare]           |
| Contig7857_s_at                     | 2AS-ab-k71_contig_5225988:1-3104           | 1E-125        | gi 326528587 dbj BAJ93475.1  predicted protein [Hordeum vulgare subsp. vulgare]           |
| Contig1402_at                       | 3AS-ab-k71_contig_2573541:1-247            | 3E-38         | gi 475601114 gb EMT24719.1  GDSL esterase/lipase [Aegilops tauschii]                      |
| HW08K02u_at                         | 4BS-ab-k71_contig_4865249:5225-6279        | 1E-59         | gi 326514238 dbj BAJ92269.1  predicted protein [Hordeum vulgare subsp. vulgare]           |
| HV10A20u_s_at                       | 1AL_v2-ab-k71_contig_3912549:1123-3112     | 4E-16         | gi 474392822 gb EMS65496.1  Cysteine proteinase RD21a [Triticum urartu]                   |
| Contig21245_at                      | 3B-ab-k71_contig_10417977:695-3511         | 0             | gi 326494096 dbj BAJ85510.1  predicted protein [Hordeum vulgare subsp. vulgare]           |
| Contig26_at                         | 5BL-ab-k71_contig_10806933:541-1198        | 1E-178        | gi 195617694 gb ACG30677.1  histone H4 [Zea mays]                                         |
| Contig7112_at                       | 4AL_v2-ab-k71_contig_4AL_7160884:3225-4267 | 4E-64         | gi 157312498 gb ABV32166.1  UFG2 [Triticum aestivum]                                      |
| Contig7433_at                       | 2AL-ab-k71_contig_6370536:4028-8220        | 1E-119        | gi 474154143 gb EMS57069.1  Abscisic acid-inducible protein kinase [Triticum urartu]      |
| Contig7433_s_at                     | 2AL-ab-k71_contig_6370536:4028-8220        | 1E-119        | gi 474154143 gb EMS57069.1  Abscisic acid-inducible protein kinase [Triticum urartu]      |
| Contig19290_at                      | 2BL-ab-k71_contig_7936650:1-1358           | 0             | gi 474268501 gb EMS60789.1  UDP-glycosyltransferase 73C6 [Triticum urartu]                |
| Contig22948_at                      | 4BL-ab-k71_contig_6856755:3224-5930        | 2E-52         | gi 326528067 dbj BAJ89085.1  predicted protein [Hordeum vulgare subsp. vulgare]           |
| rbaal12n12_s_at                     | 5BL-ab-k71_contig_10856642:7311-10619      | 1E-158        | gi 475574369 gb EMT16972.1  Putative transporter [Aegilops tauschii]                      |
| Contig3935_s_at                     | 7BL-ab-k71_contig_6509502:9-3078           | 4E-54         | gi 473936597 gb EMS50148.1  Reticulon-like protein B2 [Triticum urartu]                   |
| HS06C20u_s_at                       | 7BL-ab-k71_contig_6509502:9-3078           | 3E-88         | gi 473936597 gb EMS50148.1  Reticulon-like protein B2 [Triticum urartu]                   |
| Contig7686_at                       | 1BL-ab-k71_contig_3825950:1469-5204        | 0             | gi 56409844 emb CAI30070.1  glycosyltransferase [Triticum aestivum]                       |
| Contig20207_s_at                    | 3AL-ab-k71_contig_1034593:1-6300           | 4E-72         | gi 326504974 dbj BAJ99498.1  predicted protein [Hordeum vulgare subsp. vulgare]           |
| Contig7343_s_at                     | 2AL-ab-k71_contig_6433511:6743-7054        | 1E-24         | gi 326516112 dbj BAJ88079.1  predicted protein [Hordeum vulgare subsp. vulgare]           |
| Contig14595_at                      | 5BL-ab-k71_contig_10872426:20719-23310     | 0             | #N/A                                                                                      |
| HS06J22u_s_at                       | 1AL_v2-ab-k71_contig_3897631:1-3252        | 6E-99         | gi 326488911 dbj BAJ98067.1  predicted protein [Hordeum vulgare subsp. vulgare]           |
| Contig9006_at                       | 1AL_v2-ab-k71_contig_3912549:1123-3112     | 0             | gi 474392822 gb EMS65496.1  Cysteine proteinase RD21a [Triticum urartu]                   |
| Contig9352_at                       | 3AS-ab-k71_contig_3442141:693-1706         | 0             | gi 383100757 emb CCG47989.1  glycosyltransferase, HGA-like, expressed [Triticum aestivum] |
| EBpi01_SQ002_N08_at                 | 4AL_v2-ab-k71_contig_4AL_7155714:1227-3637 | 9E-20         | gi 326503002 dbj BAJ99126.1  predicted protein [Hordeum vulgare subsp. vulgare]           |
| Contig9110_at                       | 7BS-ab-k71_contig_3151221:1-523            | 1E-104        | gi 326489587 dbj BAK01774.1  predicted protein [Hordeum vulgare subsp. vulgare]           |
|                                     |                                            |               | gi 326512308 dbj BAJ99509.1  predicted protein [Hordeum vulgare subsp. vulgare]           |
|                                     |                                            |               | gi 326529319 dbj BAK01053.1  predicted protein [Hordeum vulgare subsp. vulgare]           |
| HV_CEA0011J22r2_at                  | 3AL-ab-k71_contig_4345443:1-775            | 1E-41         | gi 474224339 gb EMS59376.1  hypothetical protein TRIUR3_02071 [Triticum urartu]           |

|                       |                                            |        |                                                                                                              |
|-----------------------|--------------------------------------------|--------|--------------------------------------------------------------------------------------------------------------|
| Contig18428_at        | 3AL-ab-k71_contig_1034593:1-6300           | 0      | gi 326504974 dbj BAJ99498.1  predicted protein [Hordeum vulgare subsp. vulgare]                              |
| Contig9351_s_at       | 3AS-ab-k71_contig_3442141:693-1706         | 0      | gi 383100757 emb CCG47989.1  glycosyltransferase, HGA-like, expressed [Triticum aestivum]                    |
| HT12G07u_s_at         | 6AL-ab-k71_contig_5818539:1-7046           | 3E-09  | gi 356463714 gb AET08895.1  vacuolar processing enzyme 2 [Aegilops tauschii]                                 |
| Contig17964_at        | 4AS_v2-ab-k71_contig_5977931:3675-4720     | 0      | gi 326494882 dbj BAJ94560.1  predicted protein [Hordeum vulgare subsp. vulgare]                              |
| Contig13385_s_at      | 2BL-ab-k71_contig_8062334:2765-3987        | 1E-117 | gi 326530163 dbj BAK08361.1  predicted protein [Hordeum vulgare subsp. vulgare]                              |
| Contig20405_at        | 3B-ab-k71_contig_10615303:1399-4851        | 1E-103 | gi 326500940 dbj BAJ95136.1  predicted protein [Hordeum vulgare subsp. vulgare]                              |
| Contig7359_at         | 4BL-ab-k71_contig_6887705:1-1034           | 1E-161 | gi 475595559 gb EMT23077.1  Pheophorbide a oxygenase, chloroplastic [Aegilops tauschii]                      |
| Contig7503_at         | 1AL_v2-ab-k71_contig_3960754:94-4380       | 5E-68  | gi 326523819 dbj BAJ93080.1  predicted protein [Hordeum vulgare subsp. vulgare]                              |
| Contig3892_at         | 2BL-ab-k71_contig_8088049:357-4123         | 0      | gi 326531656 dbj BAJ97832.1  predicted protein [Hordeum vulgare subsp. vulgare]                              |
| Contig5654_at         | 2AS-ab-k71_contig_5225155:1786-5351        | 1E-174 | gi 475588310 gb EMT20813.1  Putative quinone-oxidoreductase-like protein, chloroplastic [Aegilops tauschii]  |
| HA18O08r_s_at         | 5AL-ab-k95_contig_1128960:517-4580         | 2E-64  | gi 345447290 gb AEN92260.1  arginase [Triticum aestivum]                                                     |
| Contig11129_at        | 2BS-ab-k71_contig_5194333:8297-9616        | 1E-107 | gi 474114511 gb EMS55823.1  putative ornithine aminotransferase [Triticum urartu]                            |
| Contig2736_s_at       | 5AL-ab-k95_contig_2809387:2645-5504        | 1E-127 | gi 475510892 gb EMT05328.1  Adipocyte plasma membrane-associated protein [Aegilops tauschii]                 |
| Contig3691_at         | 2AS-ab-k71_contig_5252955:1-993            | 0      | gi 473891753 gb EMS48763.1  Beta-glucosidase 31 [Triticum urartu]                                            |
| Contig7997_at         | 6BL-ab-k71_contig_3771316:67-1562          | 3E-62  | gi 474253786 gb EMS60319.1  Ribonuclease 1 [Triticum urartu]                                                 |
| Contig6152_at         | 7BS-ab-k71_contig_3097754:654-17033        | 1E-155 | gi 326513484 dbj BAJ92093.1  predicted protein [Hordeum vulgare subsp. vulgare]                              |
| HV_CEb0005N09r2_at    | 6AS-ab-k71_contig_4359475:3564-5827        | 3E-85  | gi 326514820 dbj BAJ99771.1  predicted protein [Hordeum vulgare subsp. vulgare]                              |
| HVSMEm0007B06r2_s_at  | 5AL-ab-k95_contig_22698:1-1478             | 1E-132 | gi 326516984 dbj BAJ96484.1  predicted protein [Hordeum vulgare subsp. vulgare]                              |
| HV_C Ea0006M06r2_s_at | 4AL_v2-ab-k71_contig_4AL_7075859:3208-6993 | 1E-59  | gi 326525907 dbj BAJ93130.1  predicted protein [Hordeum vulgare subsp. vulgare]                              |
| Contig10193_at        | 3AL-ab-k71_contig_4336869:1-1893           | 1E-69  | gi 475589772 gb EMT21266.1  ABC transporter C family member 10 [Aegilops tauschii]                           |
| Contig23092_at        | 7BS-ab-k71_contig_3088434:3365-7082        | 0      | gi 474237122 gb EMS59633.1  Epoxide hydrolase 2 [Triticum urartu]                                            |
| Contig10270_at        | 5AL-ab-k95_contig_2783071:1-1528           | 0      | gi 474167057 gb EMS57469.1  KDEL-tailed cysteine endopeptidase CEP1 [Triticum urartu]                        |
| Contig24230_at        | 2AS-ab-k71_contig_5199858:1-856            | 1E-134 | gi 326524432 dbj BAK00599.1  predicted protein [Hordeum vulgare subsp. vulgare]                              |
| Contig17818_at        | 1AS-ab-k71_contig_3288158:270-2003         | 0      | gi 474213532 gb EMS58952.1  Elicitor-responsive protein 1 [Triticum urartu]                                  |
| HV_C Ea0006E02r2_s_at | 6AL-ab-k71_contig_5830900:430-3997         | 2E-77  | gi 326522618 dbj BAK07771.1  predicted protein [Hordeum vulgare subsp. vulgare]                              |
| Contig7293_at         | 2BL-ab-k71_contig_8052619:2011-6240        | 0      | gi 326505554 dbj BAJ95448.1  predicted protein [Hordeum vulgare subsp. vulgare]                              |
| Contig17276_at        | 5BL-ab-k71_contig_348262:1118-7118         | 0      | gi 326515132 dbj BAK03479.1  predicted protein [Hordeum vulgare subsp. vulgare]                              |
| Contig20144_s_at      | 4AL_v2-ab-k71_contig_4AL_7155714:1227-3637 | 2E-23  | gi 348549744 emb CBZ41151.1  NAC transcription factor [Hordeum vulgare subsp. vulgare]                       |
| Contig8056_at         | 6AL-ab-k71_contig_5760608:1-612            | 7E-78  | gi 326518772 dbj BAJ92547.1  predicted protein [Hordeum vulgare subsp. vulgare]                              |
|                       |                                            |        | gi 473922892 gb EMS49728.1  Quinone oxidoreductase PIG3 [Triticum urartu]                                    |
|                       |                                            |        | gi 326519885 dbj BAK03867.1  predicted protein [Hordeum vulgare subsp. vulgare]                              |
|                       |                                            |        | gi 357153424 ref XP_003576447.1  PREDICTED: ABC transporter A family member 7-like [Brachypodium distachyon] |
|                       |                                            |        | gi 326503002 dbj BAJ99126.1  predicted protein [Hordeum vulgare subsp. vulgare]                              |
|                       |                                            |        | gi 474065824 gb EMS54111.1  Peroxisomal multifunctional enzyme type 2 [Triticum urartu]                      |



|                       |                                         |        |                                                                                                                                         |
|-----------------------|-----------------------------------------|--------|-----------------------------------------------------------------------------------------------------------------------------------------|
| Contig13658_at        | 2BS-ab-k71_contig_5208331:5065-7158     | 0      | gi 475624481 gb EMT32631.1  Peroxisomal multifunctional enzyme type 2 [Aegilops tauschii]                                               |
| Contig13046_at        | 1BL-ab-k71_contig_3904034:661-2554      | 2E-62  | gi 371924997 tpe CBZ41159.1  TPA: NAC transcription factor [Hordeum vulgare subsp. vulgare]                                             |
| Contig10594_at        | 7BS-ab-k71_contig_909259:1-1586         | 0      | gi 326520874 dbj BAJ92800.1  predicted protein [Hordeum vulgare subsp. vulgare]                                                         |
| Contig5299_at         | 1BL-ab-k71_contig_3868206:2733-3775     | 0      | gi 326531956 dbj BAK01354.1  predicted protein [Hordeum vulgare subsp. vulgare]                                                         |
| Contig10981_at        | 5BS-ab-k71_contig_2274553:453-5698      | 1E-112 | gi 475558485 gb EMT13108.1  hypothetical protein F775_27330 [Aegilops tauschii]                                                         |
| Contig24105_at        | 4AS_v2-ab-k71_contig_5952279:5675-11064 | 1E-173 | gi 473939569 gb EMS50260.1  Ferredoxin-6, chloroplastic [Triticum urartu]                                                               |
| Contig1403_at         | 3AS-ab-k71_contig_2573541:1-247         | 2E-67  | gi 357157153 ref XP_003577703.1  PREDICTED: uncharacterized hydrolase HI_0588-like [Brachypodium distachyon]                            |
| Contig11890_at        | 6AL-ab-k71_contig_5830900:430-3997      | 3E-96  | gi 326506432 dbj BAJ86534.1  predicted protein [Hordeum vulgare subsp. vulgare]                                                         |
| Contig20575_at        | 1BL-ab-k71_contig_3894079:1-345         | 3E-83  | gi 475601114 gb EMT24719.1  GDSL esterase/lipase [Aegilops tauschii]                                                                    |
| Contig9954_at         | 6BL-ab-k71_contig_4309090:343-4524      | 1E-132 | gi 473922892 gb EMS49728.1  Quinone oxidoreductase PIG3 [Triticum urartu]                                                               |
| Contig6343_at         | 3B-ab-k71_contig_10520391:1337-6837     | 0      | gi 326512068 dbj BAJ96015.1  predicted protein [Hordeum vulgare subsp. vulgare]                                                         |
| Contig1404_at         | 3AS-ab-k71_contig_2573541:1-247         | 5E-80  | gi 326496777 dbj BAJ98415.1  predicted protein [Hordeum vulgare subsp. vulgare]                                                         |
| EBma03_SQ002_F16_s_at | 4AS_v2-ab-k71_contig_5955108:4662-6252  | 6E-26  | gi 326505418 dbj BAJ95380.1  predicted protein [Hordeum vulgare subsp. vulgare]                                                         |
| rbaal10h14_at         | 2BL-ab-k71_contig_8072661:19233-21176   | 3E-73  | gi 475601114 gb EMT24719.1  GDSL esterase/lipase [Aegilops tauschii]                                                                    |
| Contig1404_x_at       | 3AS-ab-k71_contig_2573541:1-247         | 5E-80  | gi 326487554 dbj BAK05449.1  predicted protein [Hordeum vulgare subsp. vulgare]                                                         |
| Contig15869_at        | 4AS_v2-ab-k71_contig_352920:1089-3423   | 0      | gi 326490093 dbj BAJ94120.1  predicted protein [Hordeum vulgare subsp. vulgare]                                                         |
| Contig10700_at        | 3B-ab-k71_contig_10699811:1993-2563     | 1E-91  | gi 326516896 dbj BAJ96440.1  predicted protein [Hordeum vulgare subsp. vulgare]                                                         |
| Contig4096_at         | 1BS-ab-k71_contig_3454525:1-7236        | 1E-135 | gi 475601114 gb EMT24719.1  GDSL esterase/lipase [Aegilops tauschii]                                                                    |
| Contig5177_s_at       | 1BL-ab-k71_contig_3830761:5135-10857    | 1E-162 | gi 189172063 gb ACD80387.1  WRKY40 transcription factor, partial [Triticum aestivum]                                                    |
| Contig4639_s_at       | 2AL-ab-k71_contig_6356061:2883-4074     | 6E-91  | gi 326490638 dbj BAJ89986.1  predicted protein [Hordeum vulgare subsp. vulgare]                                                         |
| Contig6008_s_at       | 1AL_v2-ab-k71_contig_3904007:1-2701     | 1E-171 | gi 326498703 dbj BAK02337.1  predicted protein [Hordeum vulgare subsp. vulgare]                                                         |
| Contig9392_at         | 1BS-ab-k71_contig_3431786:6994-7732     | 2E-37  | gi 474317121 gb EMS62134.1  Actin-7 [Triticum urartu]                                                                                   |
| Contig26053_at        | 3AL-ab-k71_contig_4407808:2194-3672     | 7E-74  | gi 475561024 gb EMT13696.1  Actin-7 [Aegilops tauschii]                                                                                 |
| HV_CEA0008J10r2_s_at  | 3AS-ab-k71_contig_3379776:1910-2481     | 4E-20  | gi 474390725 gb EMS65281.1  hypothetical protein TRIUR3_32617 [Triticum urartu]                                                         |
| Contig2750_s_at       | 6AL-ab-k71_contig_5767722:1-2056        | 2E-55  | gi 475600098 gb EMT24434.1  hypothetical protein F775_32163 [Aegilops tauschii]                                                         |
| Contig16179_s_at      | 1BS-ab-k71_contig_3423601:17002-26931   | 2E-13  | gi 475514050 gb EMT05681.1  Low temperature-induced protein [Aegilops tauschii]                                                         |
| HVSMEI0013E16r2_s_at  | 6AL-ab-k71_contig_5791715:1-1294        | 4E-57  | gi 475625209 gb EMT32886.1  Jasmonate O-methyltransferase [Aegilops tauschii]                                                           |
| Contig6381_at         | 3AL-ab-k71_contig_96597:80-1495         | 1E-137 | #N/A                                                                                                                                    |
| Contig16535_at        | 5BS-ab-k71_contig_2266199:109-6401      | 1E-115 | gi 475621610 gb EMT31542.1  3-ketoacyl-CoA thiolase 2, peroxisomal [Aegilops tauschii]                                                  |
| HW02O09u_s_at         | 5AL-ab-k95_contig_565469:1301-3254      | 6E-60  | gi 357130187 ref XP_003566732.1  PREDICTED: phosphatidylinositol 3-kinase, root isoform-like [Brachypodium distachyon]                  |
|                       |                                         |        | gi 326528223 dbj BAJ93293.1  predicted protein [Hordeum vulgare subsp. vulgare]                                                         |
|                       |                                         |        | gi 326528473 dbj BAJ93418.1  predicted protein [Hordeum vulgare subsp. vulgare]                                                         |
|                       |                                         |        | gi 473874636 gb EMS47816.1  Aldehyde dehydrogenase family 2 member C4 [Triticum urartu]                                                 |
|                       |                                         |        | gi 357161700 ref XP_003579177.1  PREDICTED: methylcrotonoyl-CoA carboxylase subunit alpha, mitochondrial-like [Brachypodium distachyon] |
|                       |                                         |        | gi 474265415 gb EMS60690.1  Auxin-induced protein                                                                                       |

|                     |                                             |        |                                                                                                                                   |
|---------------------|---------------------------------------------|--------|-----------------------------------------------------------------------------------------------------------------------------------|
| rbaal23d16_s_at     | 3AL-ab-k71_contig_4332102:492-3349          | 5E-28  | 5NG4 [Triticum urartu]<br>gi 475567132 gb EMT15199.1  putative Isocitrate dehydrogenase (NADP), chloroplastic [Aegilops tauschii] |
| HVSMEI0010P10f_x_at | 2BS-ab-k71_contig_5201747:10374-13960       | 8E-35  | gi 345447290 gb AEN92260.1  arginase [Triticum aestivum]                                                                          |
| Contig6659_s_at     | 3B-ab-k71_contig_10639283:103-4231          | 1E-102 | gi 474156727 gb EMS57131.1  Sphingosine-1-phosphate lyase [Triticum urartu]                                                       |
| Contig2253_s_at     | 2AL-ab-k71_contig_6439401:36-885            | 0      | gi 475515312 gb EMT05831.1  Histone H1 [Aegilops tauschii]                                                                        |
| Contig10984_at      | 3AL-ab-k71_contig_4450714:278-8391          | 0      | gi 161702907 gb ABX76295.1  neutral ceramidase [Triticum aestivum]                                                                |
| Contig25897_at      | 7BS-ab-k71_contig_3065267:1-5116            | 0      | gi 474036949 gb EMS53193.1  FACT complex subunit SPT16 [Triticum urartu]                                                          |
| rbaal21e22_x_at     | 6AL-ab-k71_contig_5767722:1-2056            | 3E-18  | gi 475621610 gb EMT31542.1  3-ketoacyl-CoA thiolase 2, peroxisomal [Aegilops tauschii]                                            |
| HV_CEA0008J10r2_at  | 3AS-ab-k71_contig_3379776:1910-2481         | 4E-20  | #N/A                                                                                                                              |
| Contig17260_at      | 6AS-ab-k71_contig_4351215:1-1669            | 9E-99  | gi 326497895 dbj BAJ94810.1  predicted protein [Hordeum vulgare subsp. vulgare]                                                   |
| Contig17135_s_at    | 2BL-ab-k71_contig_8062334:2765-3987         | 3E-44  | gi 326531478 dbj BAJ97743.1  predicted protein [Hordeum vulgare subsp. vulgare]                                                   |
| EBpi03_SQ001_I14_at | 4AL_v2-ab-k71_contig_4AL_7099893:6436-10911 | 8E-20  | gi 326530163 dbj BAK08361.1  predicted protein [Hordeum vulgare subsp. vulgare]                                                   |
| Contig617_x_at      | 6AS-ab-k71_contig_4349651:4661-5719         | 0      | gi 326511956 dbj BAJ95959.1  predicted protein [Hordeum vulgare subsp. vulgare]                                                   |
| Contig433_x_at      | 6BS-ab-k71_contig_2935443:1-457             | 0      | gi 475604137 gb EMT25652.1  hypothetical protein F775_43704 [Aegilops tauschii]                                                   |
| Contig346_at        | 5AL-ab-k95_contig_2799832:1371-2762         | 7E-91  | gi 31753114 gb AAH53854.1  Unknown (protein for IMAGE:5194336), partial [Homo sapiens]                                            |
| Contig6411_at       | 4AS_v2-ab-k71_contig_5994312:6000-8002      | 0      | gi 11494016 gb AAI11385.1  Unknown (protein for IMAGE:5198300), partial [Homo sapiens]                                            |
| Contig17360_at      | 6AL-ab-k71_contig_5757005:1129-7237         | 7E-62  | gi 4090293 emb CAA10497.1  hypothetical protein [Secale cereale]                                                                  |
| Contig13068_at      | 3B-ab-k71_contig_10402369:1602-2690         | 3E-43  | gi 475605702 gb EMT26171.1  3-ketoacyl-CoA synthase 1 [Aegilops tauschii]                                                         |
| Contig16209_at      | 3B-ab-k71_contig_10690339:4659-6750         | 1E-58  | gi 357145196 ref XP_003573558.1  PREDICTED: methionine aminopeptidase 1B, chloroplastic-like [Brachypodium distachyon]            |
| Contig11332_at      | 3B-ab-k71_contig_10730106:2887-7639         | 9E-96  | #N/A                                                                                                                              |
| Contig14144_at      | 6AL-ab-k71_contig_5764148:7642-9513         | 0      | gi 475580681 gb EMT18662.1  Glucoamylase [Aegilops tauschii]                                                                      |
| HVSMEh0102G02f_x_at | 4AS_v2-ab-k71_contig_5945881:18664-19150    | 2E-29  | gi 475615860 gb EMT29587.1  Putative membrane protein [Aegilops tauschii]                                                         |
| Contig21024_at      | 4AS_v2-ab-k71_contig_5970292:5240-10627     | 1E-108 | gi 473777884 gb EMS46019.1  hypothetical protein TRIUR3_07308 [Triticum urartu]                                                   |
| Contig16113_at      | 2AL-ab-k71_contig_6364940:5698-6948         | 0      | gi 326506444 dbj BAJ86540.1  predicted protein [Hordeum vulgare subsp. vulgare]                                                   |
| Contig2985_s_at     | 2BS-ab-k71_contig_5231013:12845-20601       | 0      | gi 254885381 emb CBA11528.1  sulphate transporter [Triticum aestivum]                                                             |
| Contig12563_s_at    | 6AS-ab-k71_contig_4385322:6110-7798         | 1E-126 | gi 326520605 dbj BAK07561.1  predicted protein [Hordeum vulgare subsp. vulgare]                                                   |
| Contig16015_at      | 5BS-ab-k71_contig_2287895:5743-10850        | 1E-146 | gi 14861035 gb AAK72401.1  Mg-chelatase subunit XANTHA-F [Hordeum vulgare subsp. vulgare]                                         |
| Contig2433_s_at     | 4AL_v2-ab-k71_contig_4AL_7151445:3859-11701 | 1E-161 | gi 326528365 dbj BAJ93364.1  predicted protein [Hordeum vulgare subsp. vulgare]                                                   |
| Contig2111_s_at     | 2AL-ab-k71_contig_6359939:14373-15478       | 6E-77  | gi 475534641 gb EMT08606.1  Coleoptile phototropism protein 1 [Aegilops tauschii]                                                 |
| Contig19029_at      | 7AL-ab-k71_contig_4470746:4134-4406         | 3E-67  | gi 474074549 gb EMS4507.1  Acid phosphatase 1 [Triticum urartu]                                                                   |
| HA14G19r_at         | 5AL-ab-k95_contig_13914:1-3260              | 2E-72  | gi 326521510 dbj BAK00331.1  predicted protein [Hordeum vulgare subsp. vulgare]                                                   |
| X12735_at           | 1AL_v2-ab-k71_contig_3715806:2709-4239      | 1E-131 | gi 475577656 gb EMT17876.1  Beta-galactosidase [Aegilops tauschii]                                                                |
| Contig13735_at      | 6BL-ab-k71_contig_127065:3397-4210          | 1E-125 | gi 474343675 gb EMS62751.1  2-hydroxy-6-oxo-6-phenylhexa-2,4-dienoate hydrolase [Triticum urartu]                                 |
| Contig21274_at      | 4AL_v2-ab-k71_contig_4AL_7125345:8254-15574 | 1E-138 | gi 474060351 gb EMS53958.1  Chlorophyll a-b binding protein 3C, chloroplastic [Triticum urartu]                                   |
|                     |                                             |        | gi 326488427 dbj BAJ93882.1  predicted protein [Hordeum vulgare subsp. vulgare]                                                   |
|                     |                                             |        | gi 326492676 dbj BAJ90194.1  predicted protein [Hordeum vulgare subsp. vulgare]                                                   |

|                       |                                            |        |                                                                                                                                                                                                                        |
|-----------------------|--------------------------------------------|--------|------------------------------------------------------------------------------------------------------------------------------------------------------------------------------------------------------------------------|
| Contig820_at          | 4AL_v2-ab-k71_contig_4AL_5754445:1016-3177 | 0      | gi 473913339 gb EMS49688.1  Chlorophyll a-b binding protein CP26, chloroplastic [Triticum urartu]                                                                                                                      |
| HV_CEA0016F11f_at     | 4BL-ab-k71_contig_6992715:1-4024           | 6E-14  | gi 357113513 ref XP_003558547.1  PREDICTED: uncharacterized protein LOC100823410 [Brachypodium distachyon]                                                                                                             |
| Contig16020_at        | 4BS-ab-k71_contig_4937574:115-7508         | 1E-124 | gi 357156916 ref XP_003577619.1  PREDICTED: uncharacterized protein LOC100836694 [Brachypodium distachyon]                                                                                                             |
| Contig2412_at         | 2AS-ab-k71_contig_5190107:3940-11214       | 1E-161 | gi 357122526 ref XP_003562966.1  PREDICTED: uncharacterized protein LOC100831317 [Brachypodium distachyon]                                                                                                             |
| Contig3396_s_at       | 3B-ab-k71_contig_10628326:166-917          | 1E-179 | gi 475559550 gb EMT13370.1  hypothetical protein F775_28691 [Aegilops tauschii]                                                                                                                                        |
| EBro07_SQ002_K15_x_at | 4BL-ab-k71_contig_7034718:16725-18998      | 4E-26  | #N/A                                                                                                                                                                                                                   |
| Contig194_s_at        | 5AL-ab-k95_contig_2774278:3264-4547        | 0      | gi 475614191 gb EMT29003.1  Chlorophyll a-b binding protein, chloroplastic [Aegilops tauschii]                                                                                                                         |
| HVSMEi0020J05f_x_at   | 5BL-ab-k71_contig_10916028:1304-6876       | 1E-108 | gi 326513480 dbj BAK06980.1  predicted protein [Hordeum vulgare subsp. vulgare]                                                                                                                                        |
| HVSMEh0080N02r2_at    | 2AS-ab-k71_contig_5263481:3990-5197        | 3E-25  | gi 400879 sp P31093.1 PSAN_HORVU RecName: Full=Photosystem I reaction center subunit N, chloroplastic; Short=PSI-N; Flags: Precursor gi 19095 emb CAA47056.1  photosystem I subunit N [Hordeum vulgare subsp. vulgare] |
| baak46p14_s_at        | 3AS-ab-k71_contig_3334610:1-2284           | 2E-53  | gi 326517280 dbj BAK00007.1  predicted protein [Hordeum vulgare subsp. vulgare]                                                                                                                                        |
| HVSMEi0005B04r2_x_at  | 2BS-ab-k71_contig_3595733:4298-5840        | 2E-16  | gi 58339283 gb AAW66004.1  leucine zipper protein zip1 [Triticum aestivum]                                                                                                                                             |
| Contig497_s_at        | 5AL-ab-k95_contig_2799832:1371-2762        | 3E-64  | gi 326528195 dbj BAJ89149.1  predicted protein [Hordeum vulgare subsp. vulgare]                                                                                                                                        |
| Contig3183_at         | 6BL-ab-k71_contig_2539176:1-221            | 8E-55  | gi 4090293 emb CAA10497.1  hypothetical protein [Secale cereale]                                                                                                                                                       |
| Contig14542_at        | 3B-ab-k71_contig_10550500:5495-21268       | 1E-131 | gi 475559300 gb EMT13311.1  Geranylgeranyl diphosphate reductase, chloroplastic [Aegilops tauschii]                                                                                                                    |
| Contig4700_at         | 3B-ab-k71_contig_10631745:24-4235          | 0      | gi 475570720 gb EMT16094.1  Alpha-amylase [Aegilops tauschii]                                                                                                                                                          |
| Contig3146_at         | 1AS-ab-k71_contig_2183291:104-3156         | 0      | gi 357141239 ref XP_003572147.1  PREDICTED: uncharacterized protein At4g01050, chloroplastic-like [Brachypodium distachyon]                                                                                            |
| HV_CEA0015D14r2_at    | 5BL-ab-k71_contig_10902908:2670-5635       | 1E-176 | gi 354681874 dbj BAL04917.1  glutamyl tRNA reductase [Triticum aestivum]                                                                                                                                               |
| Contig5026_at         | 6AS-ab-k71_contig_3291344:4049-4863        | 9E-83  | gi 326531042 dbj BAK04872.1  predicted protein [Hordeum vulgare subsp. vulgare]                                                                                                                                        |
| Contig23482_at        | 6AL-ab-k71_contig_5826035:1-3331           | 1E-55  | gi 475596216 gb EMT23305.1  hypothetical protein F775_30333 [Aegilops tauschii]                                                                                                                                        |
| HV_CEB0017F03r2_s_at  | 7AS-ab-k71_contig_4215480:1887-3348        | 1E-144 | gi 326502018 dbj BAK06501.1  predicted protein [Hordeum vulgare subsp. vulgare]                                                                                                                                        |
| Contig14841_at        | 5BS-ab-k71_contig_2261475:1-2128           | 2E-74  | gi 225690802 gb ACO06087.1  chlorophyll a-b binding protein [Triticum aestivum]                                                                                                                                        |
| Contig8679_at         | 5AL-ab-k95_contig_2748254:476-3293         | 1E-171 | gi 357114424 ref XP_003559000.1  PREDICTED: uncharacterized protein LOC100832376 [Brachypodium distachyon]                                                                                                             |
| S78730_at             | 5BL-ab-k71_contig_10916028:1304-6876       | 1E-149 | gi 326520313 dbj BAK07415.1  predicted protein [Hordeum vulgare subsp. vulgare]                                                                                                                                        |
| Contig7304_s_at       | 6BS-ab-k71_contig_3024079:10228-11218      | 0      | gi 326513480 dbj BAK06980.1  predicted protein [Hordeum vulgare subsp. vulgare]                                                                                                                                        |
| Contig5659_at         | 7BS-ab-k71_contig_3068208:1-163            | 7E-77  | gi 475458442 gb EMT01926.1  O-methyltransferase ZRP4 [Aegilops tauschii]                                                                                                                                               |
| Contig20267_at        | 5BL-ab-k71_contig_10790778:15407-18782     | 1E-124 | gi 475558039 gb EMT12976.1  50S ribosomal protein 6, chloroplastic [Aegilops tauschii]                                                                                                                                 |
| Contig9660_at         | 6AL-ab-k71_contig_5808587:152-3532         | 2E-63  | gi 326489459 dbj BAK01710.1  predicted protein [Hordeum vulgare subsp. vulgare]                                                                                                                                        |
| HVSMEh0080L10r2_x_at  | 7BS-ab-k71_contig_3164750:1-1240           | 1E-80  | gi 326494976 dbj BAJ85583.1  predicted protein [Hordeum vulgare subsp. vulgare]                                                                                                                                        |
| rbah53j14_at          | 2BL-ab-k71_contig_7993541:454-2439         | 5E-80  | gi 326506224 dbj BAJ86430.1  predicted protein [Hordeum vulgare subsp. vulgare]                                                                                                                                        |
|                       |                                            |        | gi 225690802 gb ACO06087.1  chlorophyll a-b binding protein [Triticum aestivum]                                                                                                                                        |
|                       |                                            |        | gi 326500100 dbj BAJ90885.1  predicted protein [Hordeum vulgare subsp. vulgare]                                                                                                                                        |
|                       |                                            |        | gi 326527749 dbj BAK08149.1  predicted protein                                                                                                                                                                         |

|                       |                                         |        |                                                                                                                                                                                                                                                                                                                                                                                                                                                                                                                                                                                                            |
|-----------------------|-----------------------------------------|--------|------------------------------------------------------------------------------------------------------------------------------------------------------------------------------------------------------------------------------------------------------------------------------------------------------------------------------------------------------------------------------------------------------------------------------------------------------------------------------------------------------------------------------------------------------------------------------------------------------------|
| Contig1208_s_at       | 7BS-ab-k71_contig_3164750:1-1240        | 0      | [Hordeum vulgare subsp. vulgare]<br>gi 225690802 gb ACO06087.1  chlorophyll a-b binding protein [Triticum aestivum]                                                                                                                                                                                                                                                                                                                                                                                                                                                                                        |
| Contig7305_at         | 6BS-ab-k71_contig_3024079:10228-11218   | 0      | gi 475458442 gb EMT01926.1  O-methyltransferase ZRP4 [Aegilops tauschii]                                                                                                                                                                                                                                                                                                                                                                                                                                                                                                                                   |
| Contig2766_s_at       | 1AL_v2-ab-k71_contig_3874670:3902-5985  | 1E-152 | gi 10720236 sp Q42850.1 PORB_HORVU RecName: Full=Protochlorophyllide reductase B, chloroplastic; Short=PCR B; AltName: Full=NADPH-protochlorophyllide oxidoreductase B; Short=POR B; Flags: Precursor gi 683476 emb CAA59228.1  NADPH dehydrogenase [Hordeum vulgare]<br>gi 326488707 dbj BAJ97965.1  predicted protein [Hordeum vulgare subsp. vulgare]<br>gi 326493324 dbj BAJ85123.1  predicted protein [Hordeum vulgare subsp. vulgare]<br>gi 326494290 dbj BAJ90414.1  predicted protein [Hordeum vulgare subsp. vulgare]<br>gi 474399175 gb EMS65931.1  Lipoxigenase 1 [Triticum urartu]             |
| Contig12574_at        | 2AL-ab-k71_contig_6437732:12404-19901   | 0      | gi 218191232 gb EEC73659.1  hypothetical protein OsI_08191 [Oryza sativa Indica Group]                                                                                                                                                                                                                                                                                                                                                                                                                                                                                                                     |
| EBed02_SQ002_E18_s_at | 6AL-ab-k71_contig_5789067:4555-10598    | 3E-52  | gi 154551059 gb ABS83562.1  boron transporter [Hordeum vulgare] gi 154551061 gb ABS83563.1  boron transporter [Hordeum vulgare]                                                                                                                                                                                                                                                                                                                                                                                                                                                                            |
| Contig21126_at        | 4BL-ab-k71_contig_4768862:125-3354      | 2E-72  | gi 160346960 gb ABX26122.1  putative boron transporter 2 [Hordeum vulgare]                                                                                                                                                                                                                                                                                                                                                                                                                                                                                                                                 |
| Contig8854_at         | 6AL-ab-k71_contig_5789067:4555-10598    | 1E-142 | gi 218191232 gb EEC73659.1  hypothetical protein OsI_08191 [Oryza sativa Indica Group]                                                                                                                                                                                                                                                                                                                                                                                                                                                                                                                     |
| HVSMEa0012N07r2_at    | 3B-ab-k71_contig_10594544:114-2512      | 4E-35  | gi 326523645 dbj BAJ92993.1  predicted protein [Hordeum vulgare subsp. vulgare]<br>gi 326524189 dbj BAJ97105.1  predicted protein [Hordeum vulgare subsp. vulgare]                                                                                                                                                                                                                                                                                                                                                                                                                                         |
| Contig2762_at         | 1AL_v2-ab-k71_contig_3874670:3902-5985  | 0      | gi 10720236 sp Q42850.1 PORB_HORVU RecName: Full=Protochlorophyllide reductase B, chloroplastic; Short=PCR B; AltName: Full=NADPH-protochlorophyllide oxidoreductase B; Short=POR B; Flags: Precursor gi 683476 emb CAA59228.1  NADPH dehydrogenase [Hordeum vulgare]<br>gi 326488707 dbj BAJ97965.1  predicted protein [Hordeum vulgare subsp. vulgare]<br>gi 326493324 dbj BAJ85123.1  predicted protein [Hordeum vulgare subsp. vulgare]<br>gi 326494290 dbj BAJ90414.1  predicted protein [Hordeum vulgare subsp. vulgare]<br>gi 354681872 dbj BAL04916.1  glutamyl tRNA reductase [Triticum aestivum] |
| Contig3148_at         | 1BS-ab-k71_contig_3481555:1190-3041     | 0      | gi 326489448 dbj BAK01705.1  predicted protein [Hordeum vulgare subsp. vulgare]                                                                                                                                                                                                                                                                                                                                                                                                                                                                                                                            |
| Contig19438_at        | 2BL-ab-k71_contig_8039865:2256-6860     | 1E-175 | gi 473789781 gb EMS46316.1  Photosystem I reaction center subunit XI, chloroplastic [Triticum urartu]                                                                                                                                                                                                                                                                                                                                                                                                                                                                                                      |
| Contig2177_at         | 3B-ab-k71_contig_10484319:1384-2702     | 0      | gi 326528371 dbj BAJ93367.1  predicted protein [Hordeum vulgare subsp. vulgare]                                                                                                                                                                                                                                                                                                                                                                                                                                                                                                                            |
| rbah35f01_s_at        | 2AS-ab-k71_contig_5307368:5342-15094    | 6E-96  | gi 475621673 gb EMT31573.1  Ribonuclease 1 [Aegilops tauschii]                                                                                                                                                                                                                                                                                                                                                                                                                                                                                                                                             |
| Contig5059_s_at       | 1BL-ab-k71_contig_3797658:2212-4443     | 0      | #N/A                                                                                                                                                                                                                                                                                                                                                                                                                                                                                                                                                                                                       |
| HVSMEf0013I09r2_at    | 2BS-ab-k71_contig_5166420:1548-4919     | 2E-46  | gi 21668465 dbj BAA07785.3  plastid omega-3 fatty acid desaturase [Triticum aestivum]                                                                                                                                                                                                                                                                                                                                                                                                                                                                                                                      |
| Contig9169_at         | 2BS-ab-k71_contig_5200682:6276-9820     | 0      | gi 475614190 gb EMT29002.1  Chlorophyll a-b binding protein, chloroplastic [Aegilops tauschii]                                                                                                                                                                                                                                                                                                                                                                                                                                                                                                             |
| Contig628_x_at        | 5BL-ab-k71_contig_10831572:1917-3005    | 0      | gi 475614190 gb EMT29002.1  Chlorophyll a-b binding protein, chloroplastic [Aegilops tauschii]                                                                                                                                                                                                                                                                                                                                                                                                                                                                                                             |
| Contig418_at          | 1BL-ab-k71_contig_1678368:429-2096      | 0      | gi 475614191 gb EMT29003.1  Chlorophyll a-b binding protein, chloroplastic [Aegilops tauschii]                                                                                                                                                                                                                                                                                                                                                                                                                                                                                                             |
| Contig422_at          | 5AL-ab-k95_contig_2774278:3264-4547     | 0      | gi 475614190 gb EMT29002.1  Chlorophyll a-b binding protein, chloroplastic [Aegilops tauschii]                                                                                                                                                                                                                                                                                                                                                                                                                                                                                                             |
| Contig841_x_at        | 1BL-ab-k71_contig_1678368:429-2096      | 0      | gi 475614190 gb EMT29002.1  Chlorophyll a-b binding protein, chloroplastic [Aegilops tauschii]                                                                                                                                                                                                                                                                                                                                                                                                                                                                                                             |
| Contig828_s_at        | 1AL_v2-ab-k71_contig_3941328:9659-11114 | 0      | gi 475614190 gb EMT29002.1  Chlorophyll a-b binding protein, chloroplastic [Aegilops tauschii]                                                                                                                                                                                                                                                                                                                                                                                                                                                                                                             |
| Contig14143_s_at      | 6AL-ab-k71_contig_5764148:7642-9513     | 1E-152 | gi 473777884 gb EMS46019.1  hypothetical protein TRIUR3_07308 [Triticum urartu]                                                                                                                                                                                                                                                                                                                                                                                                                                                                                                                            |
| Contig6_x_at          | 6AS-ab-k71_contig_4354575:1792-2909     | 0      | gi 473952980 gb EMS50796.1  Chlorophyll a-b binding                                                                                                                                                                                                                                                                                                                                                                                                                                                                                                                                                        |

|                    |                                            |        |                                                                                                                                                                                                                                                                                                                                                                                                                                                                                   |
|--------------------|--------------------------------------------|--------|-----------------------------------------------------------------------------------------------------------------------------------------------------------------------------------------------------------------------------------------------------------------------------------------------------------------------------------------------------------------------------------------------------------------------------------------------------------------------------------|
| Contig11957_at     | 2BS-ab-k71_contig_5229550:15258-16617      | 0      | protein, chloroplastic [Triticum urartu]<br>gi 475518448 gb EMT06200.1  Cytochrome P450 71C1 [Aegilops tauschii]                                                                                                                                                                                                                                                                                                                                                                  |
| Contig347_s_at     | 6BS-ab-k71_contig_2981828:642-1842         | 0      | gi 473952980 gb EMS50796.1  Chlorophyll a-b binding protein, chloroplastic [Triticum urartu]                                                                                                                                                                                                                                                                                                                                                                                      |
| Contig6484_at      | 7AL-ab-k71_contig_4554300:1636-4345        | 0      | gi 296044566 gb ADG85703.1  putative NAC transcription factor [Triticum aestivum]                                                                                                                                                                                                                                                                                                                                                                                                 |
| Contig2764_s_at    | 2BL-ab-k71_contig_7951021:10929-19547      | 0      | gi 326507788 dbj BAJ86637.1  predicted protein [Hordeum vulgare subsp. vulgare]                                                                                                                                                                                                                                                                                                                                                                                                   |
| HV03G23u_s_at      | 1BL-ab-k71_contig_3792355:1-3151           | 2E-63  | gi 354681870 dbj BAL04915.1  glutamyl tRNA reductase [Triticum aestivum]                                                                                                                                                                                                                                                                                                                                                                                                          |
| Contig636_at       | 1BL-ab-k71_contig_3813291:2683-4178        | 0      | gi 475623771 gb EMT32357.1  Chlorophyll a-b binding protein of LHCII type III, chloroplastic [Aegilops tauschii]                                                                                                                                                                                                                                                                                                                                                                  |
| Contig12240_at     | 6BL-ab-k71_contig_4303428:96-1083          | 0      | gi 473822355 gb EMS47061.1  hypothetical protein TRIUR3_14995 [Triticum urartu]                                                                                                                                                                                                                                                                                                                                                                                                   |
| baak1b18_at        | 7BS-ab-k71_contig_3100652:1-380            | 2E-92  | #N/A                                                                                                                                                                                                                                                                                                                                                                                                                                                                              |
| Contig15259_at     | 7BS-ab-k71_contig_3156232:805-2519         | 3E-37  | gi 60100238 gb AAX13288.1  senescence-associated protein [Triticum aestivum]                                                                                                                                                                                                                                                                                                                                                                                                      |
| HVSMEn0021L12r2_at | 2BS-ab-k71_contig_5166420:1548-4919        | 2E-08  | #N/A                                                                                                                                                                                                                                                                                                                                                                                                                                                                              |
| baak1b18_x_at      | 7BS-ab-k71_contig_3100652:1-380            | 2E-92  | #N/A                                                                                                                                                                                                                                                                                                                                                                                                                                                                              |
| HVSMeg0006C07r2_at | 2AL-ab-k71_contig_6363708:6428-7130        | 2E-58  | gi 82780760 gb ABB90549.1  putative membrane protein [Triticum aestivum]                                                                                                                                                                                                                                                                                                                                                                                                          |
| Contig18687_at     | 5BL-ab-k71_contig_10866110:23976-25433     | 3E-61  | gi 475581852 gb EMT18963.1  hypothetical protein F775_26051 [Aegilops tauschii]                                                                                                                                                                                                                                                                                                                                                                                                   |
| Contig1012_s_at    | 5BL-ab-k71_contig_10834918:4913-6105       | 0      | gi 475614191 gb EMT29003.1  Chlorophyll a-b binding protein, chloroplastic [Aegilops tauschii]                                                                                                                                                                                                                                                                                                                                                                                    |
| Contig950_at       | 5AL-ab-k95_contig_1127310:1-799            | 1E-111 | gi 131176 sp P13194.2 PSAE_HORVU RecName: Full=Photosystem I reaction center subunit IV, chloroplastic; Short=PSI-E; AltName: Full=Photosystem I 10.8 kDa polypeptide; Flags: Precursor<br>gi 19087 emb CAA68782.1  unnamed protein product [Hordeum vulgare] gi 326503110 dbj BAJ99180.1  predicted protein [Hordeum vulgare subsp. vulgare]<br>gi 226163 prf  1413233A 10.8kD photosystem I protein<br>gi 82780760 gb ABB90549.1  putative membrane protein [Triticum aestivum] |
| Contig2859_s_at    | 2AL-ab-k71_contig_6363708:6428-7130        | 3E-98  | gi 473952980 gb EMS50796.1  Chlorophyll a-b binding protein, chloroplastic [Triticum urartu]                                                                                                                                                                                                                                                                                                                                                                                      |
| Contig926_x_at     | 6BS-ab-k71_contig_2981828:642-1842         | 0      | gi 473952980 gb EMS50796.1  Chlorophyll a-b binding protein, chloroplastic [Triticum urartu]                                                                                                                                                                                                                                                                                                                                                                                      |
| Contig26393_at     | 2BL-ab-k71_contig_7955957:1964-3724        | 1E-169 | gi 326527993 dbj BAJ89048.1  predicted protein [Hordeum vulgare subsp. vulgare]                                                                                                                                                                                                                                                                                                                                                                                                   |
| Contig2411_at      | 2AS-ab-k71_contig_5190107:3940-11214       | 1E-134 | gi 357122526 ref XP_003562966.1  PREDICTED: uncharacterized protein LOC100831317 [Brachypodium distachyon]                                                                                                                                                                                                                                                                                                                                                                        |
| Contig168_at       | 4AL_v2-ab-k71_contig_4AL_5754445:1016-3177 | 0      | gi 473913339 gb EMS49688.1  Chlorophyll a-b binding protein CP26, chloroplastic [Triticum urartu]                                                                                                                                                                                                                                                                                                                                                                                 |
| Contig960_s_at     | 6AS-ab-k71_contig_4354575:1792-2909        | 1E-116 | gi 473952980 gb EMS50796.1  Chlorophyll a-b binding protein, chloroplastic [Triticum urartu]                                                                                                                                                                                                                                                                                                                                                                                      |
| HO08B11S_at        | 4AL_v2-ab-k71_contig_4AL_7099598:762-2473  | 1E-44  | gi 475559215 gb EMT13284.1  3-ketoacyl-CoA synthase 6 [Aegilops tauschii]                                                                                                                                                                                                                                                                                                                                                                                                         |

**Table S5.** List of 33 loci significantly upregulated between HD and 12 DAA in WT plants but not in *gpc-A1* plants.

| Locus                                  | IWGSC ID            | Sequence description                                | Gene name             |
|----------------------------------------|---------------------|-----------------------------------------------------|-----------------------|
| IWGSC_CSS_7AL_scaff_4381790:1-1789     | Traes_7AL_6AE850114 | Cadmium zinc-transporting ATPase 3                  | <i>TaHMA2-likeA</i>   |
| IWGSC_CSS_7BL_scaff_6741649:1-1191     | Traes_7BL_0CF58CF4E | Cadmium zinc-transporting ATPase 3                  | <i>TaHMA2-likeB</i>   |
| IWGSC_CSS_3AS_scaff_3289235:1-527      | Traes_3AS_E59FB52EC | Probable peptide nitrate transporter at3g43790-like | <i>TaZIFL2-like1A</i> |
| IWGSC_CSS_4BS_scaff_4884666:3611-13951 | Traes_4BS_1DCF82CB7 | Protein zinc induced facilitator-like 1-like        | <i>TaZIFL3B</i>       |
| IWGSC_CSS_7AL_scaff_4404279:2840-3532  | Traes_7AL_F1D611563 | Zinc transporter 10                                 | <i>TaZIP10-like1A</i> |
| IWGSC_CSS_2BS_scaff_5173470:2532-5129  | Traes_2BS_9D8F265EC | Zinc transporter 1                                  | <i>TaZIP13-like2B</i> |
| IWGSC_CSS_2BL_scaff_8072119:162-3787   | Traes_2BL_A1BCBD2BE | Zinc transporter 1                                  | <i>TaZIP13-likeB</i>  |
| IWGSC_CSS_2AL_scaff_1213723:1-2131     | Traes_2AL_3983FD077 | Zinc transporter zip1                               | <i>TaZIP3A</i>        |
| IWGSC_CSS_1AS_scaff_3313103:14-652     | Traes_1AS_EC8891094 | Zinc transporter protein zip7                       | <i>TaZIP7A</i>        |
| IWGSC_CSS_1AS_scaff_3258126:5939-9519  | Traes_1AS_50323685E | Zinc transporter 7-like                             | <i>TaZIP7A</i>        |
| IWGSC_CSS_1BS_scaff_3424485:2111-5600  | Traes_1BS_D68F0BED6 | Zinc transporter 7-like                             | <i>TaZIP7B</i>        |
| IWGSC_CSS_7BS_scaff_3097754:654-17033  | Traes_7BS_BB0FECDBE | ABC transporter C family member 10                  |                       |
| IWGSC_CSS_3AS_scaff_3280126:1-370      | N/A                 | Aquaporin TIP4-3-like                               |                       |
| IWGSC_CSS_3B_scaff_7192099:7-5760      | N/A                 | Coatomer subunit beta -1                            |                       |
| IWGSC_CSS_2BL_scaff_8006213:433-3492   | Traes_2BL_ACB3018DD | Ferredoxin--NADP embryo chloroplastic               |                       |
| IWGSC_CSS_2AL_scaff_6420325:2830-4395  | Traes_2AL_D24C65691 | Ferredoxin--NADP embryo chloroplastic               |                       |
| IWGSC_CSS_4BS_scaff_4865990:1587-2676  | Traes_4BS_FFF12BA9E | Ferritin 2a                                         |                       |
| IWGSC_CSS_2BL_scaff_8011889:2013-8385  | Traes_2BL_F2772688F | GDSL esterase lipase EXL3                           |                       |
| IWGSC_CSS_1BL_scaff_814680:1-755       | Traes_1BL_8DAC11230 | <b>Inwardly rectifying potassium channel AKT2</b>   |                       |
| IWGSC_CSS_5AL_scaff_2808642:7307-9079  | Traes_5AL_6C8BD96CB | Nucleolar protein 58-like isoform x1                |                       |
| IWGSC_CSS_6AL_scaff_5832728:1-551      | N/A                 | Peroxisomal multifunctional enzyme type 2           |                       |
| IWGSC_CSS_6BL_scaff_3861072:390-904    | N/A                 | Peroxisomal multifunctional enzyme type 2-like      |                       |
| IWGSC_CSS_7AL_scaff_4506504:232-7123   | Traes_7AL_7BD10B6C7 | Pleiotropic drug resistance protein 12-like         |                       |
| IWGSC_CSS_2BS_scaff_5172493:6780-8736  | Traes_2BS_D5A97B888 | Polyol transporter 5-like                           |                       |
| IWGSC_CSS_5AL_scaff_2750252:1939-3125  | Traes_5AL_8F16AB90F | Probable auxin efflux carrier component 4-like      |                       |
| IWGSC_CSS_2BL_scaff_8087489:9565-11148 | Traes_2BL_0E87D8729 | Probable peptide nitrate transporter at1g22540-like |                       |
| IWGSC_CSS_3B_scaff_10437122:613-1435   | Traes_3B_F81203C21  | Protein HASTY1-like                                 |                       |
| IWGSC_CSS_1AL_scaff_2791900:7869-11173 | Traes_1AL_039C1D96D | Protein RUPTURED POLLEN GRAIN 1                     |                       |
| IWGSC_CSS_1AL_scaff_3915680:8466-19572 | Traes_1AL_C921492AA | Squamosa promoter-binding-like protein 9            |                       |
| IWGSC_CSS_3B_scaff_10770864:1-1807     | Traes_3B_F6D9A9AEE  | S-type anion channel SLAH3                          |                       |
| IWGSC_CSS_4AL_scaff_495051:405-909     | Traes_4AL_0FEA52671 | <b>Sulfate transporter</b>                          |                       |
| IWGSC_CSS_2AL_scaff_6345426:2122-3685  | N/A                 | <b>Sulfate transporter</b>                          |                       |
| IWGSC_CSS_1BL_scaff_3829677:1628-1984  | Traes_1BL_CF65BE819 | Zinc transporter 9-like                             |                       |

**Table S6.** Details of field experiments.

| <b>Experiment</b>                                       | <b>UCD-2012</b>                                                                               | <b>TAU-2012</b>                                                        | <b>NY-2012</b>                                                                                     | <b>NY-2013</b>                                                                                     |
|---------------------------------------------------------|-----------------------------------------------------------------------------------------------|------------------------------------------------------------------------|----------------------------------------------------------------------------------------------------|----------------------------------------------------------------------------------------------------|
| <b>Location</b>                                         | Davis, CA, 38° 32' N,<br>121° 46' W                                                           | Tel-Aviv University<br>32° 6' N 34° 48' E                              | Newe Ya'ar Regional<br>Research Center 32°<br>42' N 35° 10' E                                      | Newe Ya'ar Regional<br>Research Center 32° 42' N<br>35° 10' E                                      |
| <b>Planting date</b>                                    | 11/23/2011                                                                                    | 12/12/2011                                                             | 12/7/2011                                                                                          | 12/2/2012                                                                                          |
| <b>Sowing</b>                                           | 50 seeds per row                                                                              | 8 pre-germinated<br>seedlings per row                                  | 8 pre-germinated<br>seedlings per row                                                              | 8 pre-germinated seedlings<br>per row                                                              |
| <b>Soil</b>                                             | Yolo loam soil (fine<br>silty, mixed, superactive,<br>nonacid, thermic Mollic<br>Xerofluvent) | Hamra soil (90%<br>sand, 10% clay, soil<br>N 8.2 mg kg <sup>-1</sup> ) | Heavy soil (18.7%<br>inorganic matter, 22.6%<br>sand, 57.0% silt, 1.7%<br>clay and organic matter) | Heavy soil (18.7%<br>inorganic matter, 22.6%<br>sand, 57.0% silt, 1.7% clay<br>and organic matter) |
| <b>Precipitation<br/>during growing<br/>season (mm)</b> | 232                                                                                           | 522                                                                    | 566                                                                                                | 682                                                                                                |
| <b>Irrigation</b>                                       | 1 acre foot (326,000<br>gallons) added<br>05/17/2012                                          | -                                                                      | -                                                                                                  | -                                                                                                  |
| <b>Fertilizer</b>                                       | 11 g/row ammonium<br>sulfate added 2/13/2012                                                  | 100 kg ha <sup>-1</sup> basal N<br>fertilization                       | 100 kg ha <sup>-1</sup> basal N<br>fertilization                                                   | 100 kg ha <sup>-1</sup> basal N<br>fertilization                                                   |
| <b>Randomized<br/>complete blocks</b>                   | 10                                                                                            | 4                                                                      | 5                                                                                                  | 4                                                                                                  |

**Table S7.** qRT-PCR primers used in this study and their efficiency.

| <b>Target</b>      | <b>F primer</b>      | <b>R primer</b>      | <b>Efficiency (%)</b> |
|--------------------|----------------------|----------------------|-----------------------|
| <i>HMA2-like</i>   | GAGATCCATGGGCATCAAGT | CTCCGGCAAAAGTTCAGAG  | 97.4%                 |
| <i>NAAT2</i>       | ACCCAGCAACCTTCATTCAG | CAGACCGATAATCCCCTTGA | 95.5%                 |
| <i>ZIP10-like1</i> | GCCTTCTTCTTTGCCATCAC | GGGCTGTATGGGTCGTAGAA | 95.0%                 |
| <i>ZIP10</i>       | GTGGATCTCATTGCTGCTGA | AGCCCAAATAGCCAGTGATG | 95.8%                 |
| <i>ZIP3</i>        | CTTTGAAGGCATAGGCTTGG | GATGGTTGCCCTTACCTTGA | 95.3%                 |
| <i>ZIP7</i>        | CAGGGCTCTAGTGGTCGAAG | AGAAATCGGCTGCGATTAGA | 97.3%                 |
